# Supplementary material for: Ecological drivers of sustained enzootic yellow fever virus transmission in Brazil, 2017–2021
Source: PubMed Central journal article supplement (PMC10270639; doi:10.1371/journal.pntd.0011407), 2023-06-05
Supplement: pntd.0011407.s001.pdf [file pntd.0011407.s001.pdf]

**S1 Table: Non-human primate carcasses obtained from 2019 to 2021 and tested for the presence of yellow fever virus RNA**

| <b>ID</b> | <b>Date</b> | <b>RTqPCR - YFV</b> | <b>Genus/family</b> | <b>area</b> | <b>Municipality</b> | <b>Mesoregion of Minas Gerais</b> |
|-----------|-------------|---------------------|---------------------|-------------|---------------------|-----------------------------------|
| 914       | 09/01/19    | neg                 | <i>Callithrix</i>   | urban       | Belo Horizonte      | Metropolitana                     |
| 915       | 09/01/19    | neg                 | <i>Callithrix</i>   | urban       | Itabirito           | Metropolitana                     |
| 898       | 10/01/19    | neg                 | <i>Callithrix</i>   | rural       | Moeda               | Metropolitana                     |
| 925       | 14/01/19    | neg                 | <i>Callithrix</i>   | urban       | Belo Horizonte      | Metropolitana                     |
| 933       | 16/01/19    | neg                 | Cebidae             | urban       | Pocos De Caldas     | Sul/Sudoeste de Minas             |
| 931       | 22/01/19    | neg                 | <i>Callithrix</i>   | urban       | Belo Horizonte      | Metropolitana                     |
| 935       | 30/01/19    | neg                 | <i>Callithrix</i>   | rural       | Tocantins           | Zona da Mata                      |
| 927       | 05/02/19    | neg                 | <i>Callithrix</i>   | urban       | Sao Francisco       | Norte de Minas                    |
| 926       | 06/02/19    | neg                 | <i>Callithrix</i>   | urban       | Sete Lagoas         | Metropolitana                     |
| 929       | 06/02/19    | neg                 | <i>Callithrix</i>   | urban       | Sete Lagoas         | Metropolitana                     |
| 922       | 11/02/19    | neg                 | Cebidae             | urban       | Dionisio            | Metropolitana                     |
| 920       | 12/02/19    | neg                 | <i>Callithrix</i>   | urban       | Belo Horizonte      | Metropolitana                     |
| 932       | 13/02/19    | neg                 | Cebidae             | urban-rural | Jacutinga           | Sul/Sudoeste de Minas             |
| 934       | 25/02/19    | neg                 | <i>Callithrix</i>   | urban-rural | Cataguases          | Zona da Mata                      |
| 928       | 25/02/19    | neg                 | <i>Callithrix</i>   | urban       | Leopoldina          | Zona da Mata                      |
| 921       | 26/02/19    | neg                 | <i>Callithrix</i>   | urban       | Itabira             | Metropolitana                     |
| 924       | 28/02/19    | neg                 | <i>Callithrix</i>   | urban       | Arceburgo           | Sul/Sudoeste de Minas             |
| 923       | 28/02/19    | neg                 | <i>Callithrix</i>   | urban-rural | Porto Firme         | Zona da Mata                      |
| 940       | 19/03/19    | neg                 | <i>Callithrix</i>   | urban       | Mateus Leme         | Metropolitana                     |
| 951       | 19/03/19    | neg                 | <i>Callithrix</i>   | rural       | Mirabela            | Norte de Minas                    |
| 938       | 20/03/19    | neg                 | <i>Callithrix</i>   | urban       | Belo Horizonte      | Metropolitana                     |
| 945       | 26/03/19    | neg                 | <i>Callithrix</i>   | rural       | Arceburgo           | Sul/Sudoeste de Minas             |

|      |            |     |                   |       |                         |                          |
|------|------------|-----|-------------------|-------|-------------------------|--------------------------|
| 939  | 26/03/19   | neg | <i>Callithrix</i> | rural | Piau                    | Zona da Mata             |
| 950  | 01/04/19   | neg | <i>Callithrix</i> | urban | Belo Horizonte          | Metropolitana            |
| 944  | 01/04/19   | neg | <i>Callithrix</i> | urban | Pedras De Maria Da Cruz | Norte de Minas           |
| 937  | 05/04/19   | neg | <i>Callithrix</i> | urban | Sao Tiago               | Campo das Vertentes      |
| 956  | 10/04/19   | neg | <i>Callithrix</i> | urban | Belo Horizonte          | Metropolitana            |
| 954  | 10/04/19   | neg | <i>Callithrix</i> | urban | Leopoldina              | Zona da Mata             |
| 953  | 15/04/19   | neg | <i>Callithrix</i> | urban | Visconde Do Rio Branco  | Zona da Mata             |
| 942  | 17/04/19   | neg | Cebidae           | rural | Monte Santo De Minas    | Sul/Sudoeste de Minas    |
| 949  | 23/04/19   | neg | <i>Callithrix</i> | urban | Cataguases              | Zona da Mata             |
| 936  | 24/04/19   | neg | <i>Callithrix</i> | urban | Belo Horizonte          | Metropolitana            |
| 947  | 24/04/19   | neg | <i>Callithrix</i> | urban | Belo Horizonte          | Metropolitana            |
| 946  | 25/04/19   | neg | <i>Callithrix</i> | urban | Belo Horizonte          | Metropolitana            |
| 962  | 10/05/19   | neg | <i>Callithrix</i> | rural | Itauna                  | Triângulo/Alto Paranaíba |
| 1090 | 11/05/2019 | neg | <i>Callithrix</i> | urban | Matias Barbosa          | Zona da Mata             |
| 1085 | 12/05/2019 | neg | <i>Callithrix</i> | urban | Itamogi                 | Sul/Sudoeste de Minas    |
| 965  | 15/05/19   | neg | <i>Callithrix</i> | urban | Curvelo                 | Central Mineira          |
| 957  | 22/05/19   | neg | <i>Callithrix</i> | urban | Uberlandia              | Triângulo/Alto Paranaíba |
| 958  | 22/05/19   | neg | <i>Callithrix</i> | urban | Uberlandia              | Triângulo/Alto Paranaíba |
| 959  | 22/05/19   | neg | <i>Callithrix</i> | urban | Uberlandia              | Triângulo/Alto Paranaíba |
| 960  | 22/05/19   | neg | <i>Callithrix</i> | urban | Uberlandia              | Triângulo/Alto Paranaíba |
| 968  | 22/05/19   | neg | <i>Callithrix</i> | urban | Uberlandia              | Triângulo/Alto Paranaíba |
| 970  | 23/05/19   | neg | <i>Callithrix</i> | urban | Belo Horizonte          | Metropolitana            |
| 963  | 29/05/19   | neg | <i>Callithrix</i> | urban | Curvelo                 | Central Mineira          |
| 967  | 29/05/19   | neg | <i>Callithrix</i> | urban | Curvelo                 | Central Mineira          |
| 966  | 29/05/19   | neg | <i>Callithrix</i> | urban | Nova Lima               | Metropolitana            |

|      |          |     |                   |             |                     |                          |
|------|----------|-----|-------------------|-------------|---------------------|--------------------------|
| 969  | 30/05/19 | neg | <i>Callithrix</i> | urban       | Leopoldina          | Zona da Mata             |
| 1003 | 03/06/19 | neg | <i>Callithrix</i> | urban       | Belo Horizonte      | Metropolitana            |
| 1007 | 05/06/19 | neg | <i>Callithrix</i> | urban       | Belo Horizonte      | Metropolitana            |
| 996  | 06/06/19 | neg | <i>Callithrix</i> | urban       | Belo Horizonte      | Metropolitana            |
| 1000 | 06/06/19 | neg | <i>Callithrix</i> | rural       | Paraopeba           | Metropolitana            |
| 995  | 07/06/19 | neg | <i>Callithrix</i> | urban       | Ibirite             | Triângulo/Alto Paranaíba |
| 989  | 07/06/19 | neg | <i>Callithrix</i> | urban       | Lagoa Santa         | Metropolitana            |
| 1001 | 07/06/19 | neg | <i>Callithrix</i> | urban       | Lagoa Santa         | Metropolitana            |
| 1002 | 07/06/19 | neg | <i>Callithrix</i> | urban       | Lagoa Santa         | Metropolitana            |
| 999  | 18/06/19 | neg | <i>Callithrix</i> | urban       | Conceicao Dos Ouros | Triângulo/Alto Paranaíba |
| 987  | 18/06/19 | neg | <i>Callithrix</i> | urban       | Itabirito           | Metropolitana            |
| 1004 | 19/06/19 | neg | <i>Callithrix</i> | urban       | Belo Horizonte      | Metropolitana            |
| 1008 | 24/06/19 | neg | <i>Callithrix</i> | urban-rural | Alem Paraiba        | Zona da Mata             |
| 1005 | 24/06/19 | neg | <i>Callithrix</i> | urban       | Alem Paraiba        | Zona da Mata             |
| 997  | 24/06/19 | neg | <i>Callithrix</i> | urban       | Leopoldina          | Zona da Mata             |
| 991  | 26/06/19 | neg | <i>Callithrix</i> | urban       | Belo Horizonte      | Metropolitana            |
| 1006 | 26/06/19 | neg | <i>Callithrix</i> | urban       | Nova Lima           | Metropolitana            |
| 998  | 27/06/19 | neg | <i>Callithrix</i> | urban       | Belo Horizonte      | Metropolitana            |
| 992  | 27/06/19 | neg | <i>Callithrix</i> | urban       | Itabira             | Metropolitana            |
| 993  | 27/06/19 | neg | <i>Callithrix</i> | urban       | Timoteo             | Vale do Rio Doce         |
| 984  | 01/07/19 | neg | <i>Callithrix</i> | urban       | Ubai                | Norte de Minas           |
| 990  | 01/07/19 | neg | <i>Callithrix</i> | urban       | Ubai                | Norte de Minas           |
| 994  | 01/07/19 | neg | <i>Callithrix</i> | rural       | Virgem Da Lapa      | Jequitinhonha            |
| 980  | 02/07/19 | neg | <i>Callithrix</i> | urban       | Santa Luzia         | Metropolitana            |
| 978  | 08/07/19 | neg | <i>Callithrix</i> | rural       | Alem Paraiba        | Zona da Mata             |

|      |            |     |                   |             |                        |                          |
|------|------------|-----|-------------------|-------------|------------------------|--------------------------|
| 986  | 08/07/19   | neg | <i>Callithrix</i> | urban       | Leopoldina             | Zona da Mata             |
| 985  | 09/07/19   | neg | <i>Callithrix</i> | rural       | Sete Lagoas            | Metropolitana            |
| 988  | 10/07/19   | neg | <i>Callithrix</i> | urban       | Teofilo Otoni          | Vale do Mucuri           |
| 979  | 10/07/19   | neg | <i>Callithrix</i> | rural       | Uberlandia             | Triângulo/Alto Paranaíba |
| 983  | 10/07/19   | neg | <i>Callithrix</i> | urban       | Uberlandia             | Triângulo/Alto Paranaíba |
| 982  | 10/07/19   | neg | Cebidae           | rural       | Piracema               | Oeste de Minas           |
| 974  | 16/07/19   | neg | <i>Callithrix</i> | urban       | Santa Luzia            | Metropolitana            |
| 975  | 23/07/19   | neg | <i>Callithrix</i> | urban       | Belo Horizonte         | Metropolitana            |
| 976  | 24/07/19   | neg | <i>Callithrix</i> | urban       | Araguari               | Triângulo/Alto Paranaíba |
| 971  | 29/07/19   | neg | <i>Callithrix</i> | urban       | Formiga                | Oeste de Minas           |
| 981  | 31/07/19   | neg | <i>Callithrix</i> | urban       | Araguari               | Triângulo/Alto Paranaíba |
| 972  | 31/07/19   | neg | <i>Callithrix</i> | urban       | Uberlandia             | Triângulo/Alto Paranaíba |
| 1034 | 05/08/2019 | neg | <i>Callithrix</i> | urban       | Cataguases             | Zona da Mata             |
| 1036 | 05/08/2019 | neg | <i>Callithrix</i> | urban       | Cataguases             | Zona da Mata             |
| 1026 | 08/08/2019 | neg | <i>Callithrix</i> | urban       | Sete Lagoas            | Metropolitana            |
| 1027 | 08/08/2019 | neg | <i>Callithrix</i> | urban       | Sete Lagoas            | Metropolitana            |
| 1031 | 09/08/2019 | neg | <i>Callithrix</i> | urban-rural | Ibirité                | Metropolitana            |
| 1098 | 11/08/2019 | neg | <i>Callithrix</i> | urban       | Belo Horizonte         | Metropolitana            |
| 1025 | 12/08/2019 | neg | Cebidae           | rural       | Piracema               | Oeste de Minas           |
| 1024 | 26/08/2019 | neg | <i>Callithrix</i> | urban       | Leopoldina             | Zona da Mata             |
| 1029 | 26/08/2019 | neg | <i>Callithrix</i> | rural       | Visconde Do Rio Branco | Zona da Mata             |
| 1018 | 28/08/2019 | neg | <i>Callithrix</i> | rural       | Guanhaes               | Metropolitana            |
| 1009 | 28/08/2019 | neg | <i>Callithrix</i> | urban       | Guanhaes               | Metropolitana            |
| 1011 | 28/08/2019 | neg | <i>Callithrix</i> | urban       | Santa Luzia            | Metropolitana            |
| 1033 | 04/09/2019 | neg | <i>Callithrix</i> | urban       | Belo Horizonte         | Metropolitana            |

|      |            |     |                   |             |                        |                          |
|------|------------|-----|-------------------|-------------|------------------------|--------------------------|
| 1035 | 04/09/2019 | neg | <i>Callithrix</i> | urban       | Belo Horizonte         | Metropolitana            |
| 1037 | 04/09/2019 | neg | <i>Callithrix</i> | urban       | Carangola              | Metropolitana            |
| 1023 | 11/09/2019 | neg | <i>Callithrix</i> | urban       | Araxa                  | Metropolitana            |
| 1017 | 11/09/2019 | neg | <i>Callithrix</i> | urban       | Divinópolis            | Metropolitana            |
| 1028 | 11/09/2019 | neg | <i>Callithrix</i> | urban       | Divinópolis            | Metropolitana            |
| 1030 | 11/09/2019 | neg | <i>Callithrix</i> | urban       | Pedro Leopoldo         | Metropolitana            |
| 1032 | 11/09/2019 | neg | <i>Callithrix</i> | urban       | Sao Francisco          | Norte de Minas           |
| 1015 | 13/09/2019 | neg | Cebidae           | rural       | Sao Sebastiao Do Oeste | Metropolitana            |
| 1021 | 17/09/2019 | neg | <i>Callithrix</i> | rural       | Bom Despacho           | Metropolitana            |
| 1016 | 19/09/2019 | neg | <i>Callithrix</i> | rural       | Patrocinio             | Triângulo/Alto Paranaíba |
| 1014 | 30/09/2019 | neg | <i>Callithrix</i> | urban       | Leopoldina             | Zona da Mata             |
| 1019 | 04/10/2019 | neg | Cebidae           | rural       | Sabinópolis            | Metropolitana            |
| 1010 | 16/10/2019 | neg | <i>Callithrix</i> | urban       | Patrocinio             | Triângulo/Alto Paranaíba |
| 1091 | 11/11/2019 | neg | <i>Callithrix</i> | urban       | Belo Horizonte         | Metropolitana            |
| 1099 | 11/11/2019 | neg | <i>Callithrix</i> | urban       | Teófilo Otoni          | Metropolitana            |
| 1081 | 05/12/2019 | neg | <i>Callithrix</i> | urban       | Araxa                  | Metropolitana            |
| 1094 | 13.01.2020 | neg | <i>Callithrix</i> | urban       | Belo Horizonte         | Metropolitana            |
| 1096 | 13.01.2020 | neg | <i>Callithrix</i> | urban       | Belo Horizonte         | Metropolitana            |
| 1101 | 13.01.2020 | neg | <i>Callithrix</i> | urban       | Belo Horizonte         | Metropolitana            |
| 1107 | 13.01.2020 | neg | <i>Callithrix</i> | urban       | Belo Horizonte         | Metropolitana            |
| 1116 | 05.02.2020 | neg | <i>Callithrix</i> | rural       | Patrocinio             | Triângulo/Alto Paranaíba |
| 1102 | 10.02.2020 | neg | <i>Callithrix</i> | urban       | Sao Jose Da Lapa       | Metropolitana            |
| 1114 | 10.02.2020 | neg | <i>Callithrix</i> | urban       | Sao Jose Da Lapa       | Metropolitana            |
| 1110 | 19.02.2020 | neg | <i>Callithrix</i> | urban-rural | Belo Horizonte         | Metropolitana            |
| 1113 | 02.03.2020 | neg | Cebidae           | rural       | Itamarandiba           | Jequitinhonha            |

|      |            |      |                   |       |                     |                          |
|------|------------|------|-------------------|-------|---------------------|--------------------------|
| 1111 | 05.03.2020 | neg  | <i>Callithrix</i> | urban | Belo Horizonte      | Metropolitana            |
| 1079 | 05.03.2020 | neg  | <i>Callithrix</i> | rural | Franciscopolis      | Vale do Mucuri           |
| 1082 | 05.03.2020 | neg  | <i>Callithrix</i> | rural | Novo Cruzeiro       | Jequitinhonha            |
| 1086 | 05.03.2020 | neg  | <i>Callithrix</i> | urban | Sao Tiago           | Campo das Vertentes      |
| 1103 | 11.03.2020 | neg  | <i>Callithrix</i> | urban | Belo Horizonte      | Metropolitana            |
| 1106 | 17.03.2020 | neg  | <i>Callithrix</i> | rural | Franciscopolis      | Vale do Mucuri           |
| 1115 | 17.03.2020 | neg  | <i>Callithrix</i> | urban | Passos              | Sul/Sudoeste de Minas    |
| 1105 | 15.04.2020 | neg  | <i>Callithrix</i> | urban | Belo Horizonte      | Metropolitana            |
| 1108 | 20.04.2020 | neg  | <i>Callithrix</i> | urban | Igarape             | Metropolitana            |
| 1112 | 06.05.2020 | neg  | <i>Callithrix</i> | rural | Campanha            | Sul/Sudoeste de Minas    |
| 1104 | 07.05.2020 | neg  | <i>Callithrix</i> | urban | Belo Horizonte      | Metropolitana            |
| 1063 | 12.06.2020 | neg  | <i>Callithrix</i> | urban | Belo Horizonte      | Metropolitana            |
| 1057 | 16.06.2020 | pos* | <i>Callithrix</i> | rural | Curvelo             | Central Mineira          |
| 1039 | 17.06.2020 | neg  | <i>Callithrix</i> | urban | Itauna              | Oeste de Minas           |
| 1074 | 18.06.2020 | neg  | <i>Callithrix</i> | urban | Ribeirao Das Neves  | Metropolitana            |
| 1042 | 18.06.2020 | neg  | <i>Callithrix</i> | urban | Santa Luzia         | Metropolitana            |
| 1056 | 22.06.2020 | neg  | <i>Callithrix</i> | urban | Ribeirao Das Neves  | Metropolitana            |
| 1049 | 01.07.2020 | neg  | <i>Callithrix</i> | urban | Belo Horizonte      | Metropolitana            |
| 1040 | 02.07.2020 | neg  | <i>Callithrix</i> | urban | Paracatu            | Noroeste de Minas        |
| 1064 | 10.07.2020 | neg  | <i>Callithrix</i> | urban | Patrocinio          | Triângulo/Alto Paranaíba |
| 1071 | 17.07.2020 | neg  | <i>Callithrix</i> | urban | Belo Horizonte      | Metropolitana            |
| 1075 | 23.07.2020 | neg  | <i>Callithrix</i> | urban | Entre Rios De Minas | Metropolitana            |
| 1048 | 04.08.2020 | neg  | <i>Callithrix</i> | urban | Uberaba             | Triângulo/Alto Paranaíba |
| 1076 | 07.08.2020 | neg  | <i>Callithrix</i> | urban | Curvelo             | Central Mineira          |
| 1055 | 25.08.2020 | neg  | <i>Callithrix</i> | urban | Gov Valadares       | Vale do Rio Doce         |

|       |            |     |                   |             |                |                          |
|-------|------------|-----|-------------------|-------------|----------------|--------------------------|
| 1050  | 25.08.2020 | neg | <i>Callithrix</i> | urban       | Sarzedo        | Metropolitana            |
| 1066  | 04.09.2020 | neg | <i>Aloutta</i>    | urban-rural | Itapagipe      | Metropolitana            |
| 1052  | 10.09.2020 | neg | <i>Callithrix</i> | urban       | Nova Lima      | Metropolitana            |
| 1044  | 15.09.2020 | neg | <i>Callithrix</i> | urban       | Belo Horizonte | Metropolitana            |
| 1078  | 16.10.2020 | neg | <i>Callithrix</i> | urban       | Araguari       | Triângulo/Alto Paranaíba |
| 1065  | 05.11.2020 | neg | <i>Callithrix</i> | urban       | Belo Horizonte | Metropolitana            |
| 1118  | 01/02/2021 | neg | <i>Callithrix</i> | urban       | Itaúna         | Oeste de Minas           |
| 1119  | 03/02/2021 | neg | <i>Callithrix</i> | urban       | Nova Lima      | Metropolitana            |
| 1126  | 12/02/2021 | neg | <i>Callithrix</i> | urban       | Timóteo        | Vale do Rio Doce         |
| 1140A | 18/02/2021 | neg | <i>Callithrix</i> | urban       | Igaratinga     | Oeste de Minas           |
| 1138  | 04/03/2021 | neg | <i>Callithrix</i> | urban       | Jaboticatubas  | Metropolitana            |
| 1135  | 16/03/2021 | neg | <i>Callithrix</i> | urban       | Belo Horizonte | Metropolitana            |
| 1122  | 30/03/2021 | neg | <i>Callithrix</i> | urban       | Belo Horizonte | Metropolitana            |
| 1132  | 23/04/2021 | neg | <i>Callithrix</i> | urban       | Araguari       |                          |
| 1130  | 10/05/2021 | neg | <i>Callithrix</i> | urban       | Belo Horizonte | Metropolitana            |
| 1126  | 18/05/2021 | neg | <i>Callithrix</i> | urban       | Belo Horizonte | Metropolitana            |
| 1141  | 26/05/2021 | neg | <i>Callithrix</i> | urban       | Belo Horizonte | Metropolitana            |
| 1143  | 30/05/2021 | neg | <i>Callithrix</i> | urban       | Belo Horizonte | Metropolitana            |
| 1145  | 30/05/2021 | neg | <i>Callithrix</i> | urban       | Belo Horizonte | Metropolitana            |
| 1155  | 01/06/2021 | neg | <i>Callithrix</i> | urban       | Itapagipe      | Metropolitana            |
| 1171  | 08/06/2021 | neg | <i>Callithrix</i> | urban       | Bom Despacho   | Metropolitana            |
| 1149  | 17/06/2021 | neg | <i>Callithrix</i> | urban       | Belo Horizonte | Metropolitana            |
| 1175  | 17/06/2021 | neg | <i>Callithrix</i> | urban       | Belo Horizonte | Metropolitana            |
| 1151  | 23/06/2021 | neg | <i>Callithrix</i> | urban       | Belo Horizonte | Metropolitana            |
| 1153  | 23/06/2021 | neg | <i>Callithrix</i> | urban       | Belo Horizonte | Metropolitana            |

|      |            |     |                   |       |                      |                       |
|------|------------|-----|-------------------|-------|----------------------|-----------------------|
| 1147 | 25/06/2021 | neg | <i>Callithrix</i> | urban | Belo Horizonte       | Metropolitana         |
| 1159 | 01/07/2021 | neg | <i>Callithrix</i> | urban | Belo Horizonte       | Metropolitana         |
| 1167 | 01/07/2021 | neg | <i>Callithrix</i> | urban | Ipatinga             | Vale do Rio Doce      |
| 1181 | 12/07/2021 | neg | <i>Callithrix</i> | urban | Belo Horizonte       | Metropolitana         |
| 1095 | 13/11/2019 | neg | <i>Callithrix</i> | rural | Carmo Do Rio Claro   | Sul/Sudoeste de Minas |
| 1092 | 17/11/2019 | neg | <i>Callithrix</i> | rural | Brasilia De Minas    | Norte de Minas        |
| 1080 | 19/11/2019 | neg | <i>Callithrix</i> | urban | Araxa                | Metropolitana         |
| 1083 | 21/11/2019 | neg | <i>Callithrix</i> | urban | Belo Horizonte       | Metropolitana         |
| 1087 | 23/10/2019 | neg | <i>Callithrix</i> | urban | Sete Lagoas          | Metropolitana         |
| 1097 | 23/10/2019 | neg | Cebidae           | rural | Munhoz               | Sul/Sudoeste de Minas |
| 1089 | 28/11/2019 | neg | <i>Callithrix</i> | urban | Morada Nova De Minas | Central Mineira       |
| 1088 | 30/10/2019 | neg | <i>Callithrix</i> | urban | Belo Horizonte       | Metropolitana         |
| 1093 | 30/10/2019 | neg | <i>Callithrix</i> | urban | Ibirite              | Metropolitana         |
| 1084 | 31/12/2019 | neg | <i>Callithrix</i> | rural | Bom Despacho         | Metropolitana         |
| 1187 | 7/15/2021  | neg | <i>Callithrix</i> | urban | Curvelo              | Central Mineira       |

ID: identification of non-human primate carcasses. Area: sampling area. Urban-rural: urban-rural interface. RTqPCR-YFV: one-step real time polymerase chain reaction for investigation of yellow fever virus RNA, performed using methods described by Domingo and colleagues, 2012 (DOI: 10.1128/JCM.01799-12). Neg: negative result, pos: positive. \* total RNA obtained from lung sample
