# Supplementary material for: Ecological drivers of sustained enzootic yellow fever virus transmission in Brazil, 2017–2021
Source: PubMed Central journal article supplement (PMC10270639; doi:10.1371/journal.pntd.0011407), 2023-06-05
Supplement: pntd.0011407.s002.pdf [file pntd.0011407.s002.pdf]

**S2 Table: Non-human primate carcasses used for analysis using generalized additive mixed models**

| ID | date      | RTqPCR - YFV |       |                   | carcass |         |              | Municipality              | lat    | long   | Mesoregion of Minas Gerais |
|----|-----------|--------------|-------|-------------------|---------|---------|--------------|---------------------------|--------|--------|----------------------------|
|    |           | Cq           | genus | period            | area    | quality |              |                           |        |        |                            |
| 5  | 1/9/2017  | pos          | 21.8  | <i>Callithrix</i> | epi     | rural   | good         | Ladainha                  | -17,63 | -41,73 | Vale do Mucuri             |
| 3  | 1/13/2017 | pos          | 10.2  | <i>Alouatta</i>   | epi     | rural   | good         | Jose Raydan               | -18,21 | -42,49 | Vale do Rio Doce           |
| 6  | 1/13/2017 | pos          | 34.5  | <i>Callithrix</i> | epi     | urban   | good         | Ipatinga                  | -19,46 | -42,53 | Vale do Rio Doce           |
| 4  | 1/13/2017 | neg          | na    | <i>Callithrix</i> | epi     | urban   | good         | Agua Boa                  | -17,99 | -42,38 | Vale do Rio Doce           |
| 7  | 1/17/2017 | pos          | 17.8  | <i>Callithrix</i> | epi     | rural   | intermediate | Sao Sebastiao do Maranhao | -18,08 | -42,57 | Vale do Rio Doce           |
| 1  | 1/19/2017 | pos          | 15.3  | <i>Callithrix</i> | epi     | rural   | good         | Sabinopolis               | -18,66 | -43,08 | Vale do Rio Doce           |
| 2  | 1/19/2017 | neg          | na    | <i>Callithrix</i> | epi     | urban   | good         | Ituiutaba                 | -18,96 | -49,46 | Triangulo/Alto Paranaiba   |
| 9  | 1/20/2017 | pos          | 13.8  | <i>Callithrix</i> | epi     | rural   | intermediate | Sao Joao Evangelista      | -18,54 | -42,76 | Vale do Rio Doce           |
| 23 | 1/20/2017 | pos          | 7.8   | <i>Callicebus</i> | epi     | rural   | good         | Sao Roque de Minas        | -20,24 | -46,36 | Oeste de Minas             |
| 27 | 1/20/2017 | pos          | 9.6   | <i>Callicebus</i> | epi     | rural   | good         | Ibia                      | -19,47 | -46,53 | Norte de Minas             |
| 10 | 1/23/2017 | pos          | 17.5  | <i>Callicebus</i> | epi     | rural   | good         | Manhuacu                  | -20,25 | -42,03 | Zona da Mata               |
| 11 | 1/23/2017 | neg          | na    | <i>Callithrix</i> | epi     | rural   | good         | Sacramento                | -19,86 | -47,44 | Triangulo/Alto Paranaiba   |
| 8  | 1/23/2017 | neg          | na    | <i>Callithrix</i> | epi     | urban   | good         | Belo Horizonte            | -19,81 | -43,95 | Metropolitana              |
| 14 | 1/24/2017 | neg          | na    | <i>Callithrix</i> | epi     | rural   | good         | Curvelo                   | -18,75 | -44,43 | Central Mineira            |
| 49 | 1/25/2017 | pos          | 10.5  | <i>Alouatta</i>   | epi     | rural   | good         | Manhuacu                  | -20,25 | -42,03 | Zona da Mata               |
| 15 | 1/25/2017 | pos          | 14.7  | <i>Alouatta</i>   | epi     | rural   | good         | Chapada Gaucha            | -15,3  | -45,61 | Norte de Minas             |
| 12 | 1/25/2017 | pos          | 19.5  | <i>Callicebus</i> | epi     | rural   | good         | Luisburgo                 | -20,44 | -42,1  | Zona da Mata               |
| 13 | 1/25/2017 | pos          | 30.8  | <i>Callithrix</i> | epi     | urban   | good         | Governador Valadares      | -18,85 | -41,94 | Vale do Rio Doce           |
| 20 | 1/25/2017 | neg          | na    | <i>Callithrix</i> | epi     | urban   | good         | Contagem                  | -19,93 | -44,05 | Metropolitana              |
| 21 | 1/25/2017 | neg          | na    | <i>Callithrix</i> | epi     | urban   | intermediate | Betim                     | -19,96 | -44,19 | Metropolitana              |
| 28 | 1/26/2017 | pos          | 28.8  | <i>Callicebus</i> | epi     | rural   | good         | Japaraiba                 | -20,14 | -45,5  | Central Mineira            |

|    |           |     |      |                   |     |             |              |                           |        |        |                          |
|----|-----------|-----|------|-------------------|-----|-------------|--------------|---------------------------|--------|--------|--------------------------|
| 18 | 1/26/2017 | pos | 36.7 | <i>Callithrix</i> | epi | urban       | good         | Curvelo                   | -18,75 | -44,43 | Central Mineira          |
| 16 | 1/27/2017 | neg | na   | <i>Callithrix</i> | epi | urban       | good         | Pocos de Caldas           | -21,78 | -46,56 | Sul/Sudoeste de Minas    |
| 25 | 1/30/2017 | pos | 35   | <i>Callithrix</i> | epi | urban       | good         | Belo Horizonte            | -19,81 | -43,95 | Metropolitana            |
| 17 | 1/30/2017 | neg | na   | <i>Callithrix</i> | epi | urban-rural | good         | Leopoldina                | -21,53 | -42,64 | Zona da Mata             |
| 47 | 2/1/2017  | pos | 37   | <i>Callicebus</i> | epi | rural       | good         | Sao Roque de Minas        | -20,24 | -46,36 | Oeste de Minas           |
| 22 | 2/2/2017  | pos | 36.6 | <i>Callithrix</i> | epi | urban       | good         | Nova Lima                 | -19,98 | -43,84 | Metropolitana            |
| 24 | 2/2/2017  | neg | na   | <i>Callithrix</i> | epi | urban       | good         | Ibia                      | -19,47 | -46,53 | Norte de Minas           |
| 26 | 2/3/2017  | pos | 14   | <i>Callithrix</i> | epi | rural       | intermediate | Chapada Gaucha            | -15,3  | -45,61 | Norte de Minas           |
| 91 | 2/3/2017  | pos | 30.7 | <i>Callicebus</i> | epi | urban-rural | good         | Ouro Preto                | -20,28 | -43,5  | Metropolitana            |
| 83 | 2/6/2017  | pos | 26   | <i>Callicebus</i> | epi | rural       | good         | PIUMHI                    | -20,46 | -45,95 | Oeste de Minas           |
| 50 | 2/7/2017  | neg | na   | <i>Alouatta</i>   | epi | rural       | good         | Sem Peixe                 | -20,1  | -42,83 | Zona da Mata             |
| 48 | 2/8/2017  | pos | 33   | <i>Callithrix</i> | epi | rural       | good         | Sao Goncalo do Rio Abaixo | -19,82 | -43,36 | Metropolitana            |
| 84 | 2/8/2017  | pos | 32.3 | <i>Callithrix</i> | epi | urban       | intermediate | Ituiutaba                 | -18,96 | -49,46 | Triangulo/Alto Paranaiba |
| 89 | 2/9/2017  | pos | 31.8 | <i>Callithrix</i> | epi | urban       | good         | PIUMHI                    | -20,46 | -45,95 | Oeste de Minas           |
| 88 | 2/10/2017 | pos | 10.2 | <i>Callithrix</i> | epi | rural       | intermediate | Jose Raydan               | -18,21 | -42,49 | Vale do Rio Doce         |
| 35 | 2/15/2017 | pos | 35.4 | <i>Callithrix</i> | epi | rural       | bad          | Nova Resende              | -21,12 | -46,42 | Sul/Sudoeste de Minas    |
| 34 | 2/15/2017 | neg | na   | <i>Callithrix</i> | epi | urban       | bad          | Vazante                   | -17,98 | -46,9  | Noroeste de Minas        |
| 38 | 2/16/2017 | pos | 35   | <i>Callithrix</i> | epi | urban       | good         | Belo Horizonte            | -19,81 | -43,95 | Metropolitana            |
| 40 | 2/16/2017 | pos | 25.5 | <i>Callithrix</i> | epi | urban       | good         | Belo Horizonte            | -19,81 | -43,95 | Metropolitana            |
| 46 | 2/16/2017 | neg | na   | <i>Callithrix</i> | epi | urban       | bad          | Betim                     | -19,96 | -44,19 | Metropolitana            |
| 45 | 2/16/2017 | neg | na   | <i>Callithrix</i> | epi | urban       | bad          | Belo Horizonte            | -19,81 | -43,95 | Metropolitana            |
| 43 | 2/16/2017 | neg | na   | <i>Callithrix</i> | epi | urban       | bad          | Guape                     | -20,76 | -45,91 | Sul/Sudoeste de Minas    |
| 30 | 2/17/2017 | pos | 11.3 | <i>Alouatta</i>   | epi | urban       | good         | Santa Rita de Caldas      | -22,02 | -46,33 | Sul/Sudoeste de Minas    |
| 37 | 2/17/2017 | pos | 33.7 | <i>Callithrix</i> | epi | urban-rural | good         | Campo Belo                | -20,89 | -45,27 | Oeste de Minas           |

|     |           |     |      |                   |     |             |              |                            |        |        |                       |
|-----|-----------|-----|------|-------------------|-----|-------------|--------------|----------------------------|--------|--------|-----------------------|
| 44  | 2/17/2017 | pos | 35.7 | <i>Callithrix</i> | epi | rural       | good         | Alterosa                   | -21,24 | -46,14 | Sul/Sudoeste de Minas |
| 29  | 2/17/2017 | pos | 8.5  | <i>Callicebus</i> | epi | rural       | good         | Conceicao do Mato Dentro   | -19,03 | -43,42 | Metropolitana         |
| 31  | 2/17/2017 | pos | 9.6  | <i>Alouatta</i>   | epi | urban       | good         | Santa Rita de Caldas       | -22,02 | -46,33 | Sul/Sudoeste de Minas |
| 33  | 2/17/2017 | neg | na   | <i>Callithrix</i> | epi | rural       | bad          | Martinho Campos            | -19,33 | -45,23 | Central Mineira       |
| 155 | 2/17/2017 | neg | na   | <i>Callithrix</i> | epi | urban       | bad          | Morada Nova de Minas       | -18,6  | -45,35 | Central Mineira       |
| 42  | 2/17/2017 | neg | na   | <i>Callithrix</i> | epi | urban       | good         | Pirapora                   | -17,34 | -44,94 | Norte de Minas        |
| 39  | 2/17/2017 | neg | na   | <i>Callithrix</i> | epi | urban       | good         | Barao de Cocais            | -19,94 | -43,48 | Metropolitana         |
| 41  | 2/17/2017 | neg | na   | <i>Callithrix</i> | epi | urban-rural | good         | Sarzedo                    | -20,03 | -44,14 | Metropolitana         |
| 36  | 2/17/2017 | neg | na   | <i>Callithrix</i> | epi | rural       | intermediate | Carmo do Cajuru            | -20,18 | -44,77 | Oeste de Minas        |
| 96  | 2/20/2017 | pos | 9.8  | <i>Alouatta</i>   | epi | rural       | good         | Abre Campo                 | -20,3  | -42,47 | Zona da Mata          |
| 80  | 2/21/2017 | pos | 12   | <i>Callithrix</i> | epi | rural       | good         | Claraval                   | -20,39 | -47,26 | Sul/Sudoeste de Minas |
| 73  | 2/21/2017 | pos | 35   | <i>Callithrix</i> | epi | urban       | intermediate | Uba                        | -21,12 | -42,94 | Zona da Mata          |
| 69  | 2/21/2017 | pos | 36   | <i>Callithrix</i> | epi | urban       | good         | Betim                      | -19,96 | -44,19 | Metropolitana         |
| 85  | 2/21/2017 | pos | 11.5 | <i>Callithrix</i> | epi | rural       | good         | Sao Jose da Barra          | -20,71 | -46,31 | Sul/Sudoeste de Minas |
| 72  | 2/21/2017 | pos | 29.1 | <i>Callithrix</i> | epi | urban       | bad          | Ribeirao das Neves         | -19,76 | -44,08 | Metropolitana         |
| 97  | 2/21/2017 | pos | 33.7 | <i>Alouatta</i>   | epi | rural       | intermediate | Bom Jesus do Amparo        | -19,7  | -43,47 | Metropolitana         |
| 78  | 2/21/2017 | pos | 9.5  | <i>Callicebus</i> | epi | rural       | good         | Sao Joao Batista do Gloria | -20,64 | -46,5  | Sul/Sudoeste de Minas |
| 79  | 2/21/2017 | neg | na   | <i>Callithrix</i> | epi | urban       | bad          | Governador Valadares       | -18,85 | -41,94 | Vale do Rio Doce      |
| 71  | 2/21/2017 | neg | na   | <i>Callithrix</i> | epi | urban       | bad          | Lagoa da Prata             | -20,02 | -45,54 | Central Mineira       |
| 70  | 2/21/2017 | neg | na   | <i>Callithrix</i> | epi | urban       | good         | Belo Horizonte             | -19,81 | -43,95 | Metropolitana         |
| 74  | 2/22/2017 | pos | 29.5 | <i>Callicebus</i> | epi | urban       | good         | Inconfidentes              | -22,31 | -46,32 | Sul/Sudoeste de Minas |
| 75  | 2/22/2017 | pos | 8.5  | <i>Callicebus</i> | epi | urban       | good         | Aguanil                    | -20,94 | -45,39 | Oeste de Minas        |
| 81  | 2/24/2017 | pos | 32   | <i>Callithrix</i> | epi | urban-rural | good         | Santa Barbara              | -19,95 | -43,41 | Metropolitana         |
| 76  | 2/24/2017 | pos | 10.3 | <i>Callicebus</i> | epi | rural       | good         | Capitolio                  | -20,61 | -46,05 | Sul/Sudoeste de Minas |

|     |           |     |      |                   |     |             |              |                           |        |        |                          |
|-----|-----------|-----|------|-------------------|-----|-------------|--------------|---------------------------|--------|--------|--------------------------|
| 90  | 2/24/2017 | pos | 31.6 | <i>Callithrix</i> | epi | urban       | good         | Ibirite                   | -20,02 | -44,05 | Metropolitana            |
| 86  | 2/24/2017 | neg | na   | <i>Callithrix</i> | epi | urban-rural | intermediate | Santa Luzia               | -19,77 | -43,85 | Metropolitana            |
| 98  | 3/1/2017  | pos | 8.3  | <i>Alouatta</i>   | epi | rural       | good         | Campestre                 | -21,71 | -46,24 | Sul/Sudoeste de Minas    |
| 77  | 3/2/2017  | pos | 34.2 | <i>Callicebus</i> | epi | rural       | intermediate | Machado                   | -21,67 | -45,92 | Sul/Sudoeste de Minas    |
| 82  | 3/3/2017  | pos | 32.4 | <i>Callithrix</i> | epi | urban       | intermediate | Guape                     | -20,76 | -45,91 | Sul/Sudoeste de Minas    |
| 101 | 3/6/2017  | pos | 35   | <i>Callithrix</i> | epi | rural       | intermediate | Papagaios                 | -19,44 | -44,74 | Metropolitana            |
| 99  | 3/6/2017  | pos | 37   | <i>Callithrix</i> | epi | urban       | good         | Felixlandia               | -18,75 | -44,89 | Central Mineira          |
| 105 | 3/6/2017  | neg | na   | <i>Callithrix</i> | epi | urban       | good         | Belo Horizonte            | -19,81 | -43,95 | Metropolitana            |
| 128 | 3/6/2017  | neg | na   | <i>Callithrix</i> | epi | urban-rural | good         | Uba                       | -21,12 | -42,94 | Zona da Mata             |
| 104 | 3/6/2017  | neg | na   | <i>Callithrix</i> | epi | urban       | intermediate | Betim                     | -19,96 | -44,19 | Metropolitana            |
| 132 | 3/7/2017  | neg | na   | <i>Callithrix</i> | epi | rural       | good         | Ibia                      | -19,47 | -46,53 | Norte de Minas           |
| 106 | 3/7/2017  | neg | na   | <i>Callithrix</i> | epi | urban       | good         | Ibia                      | -19,47 | -46,53 | Norte de Minas           |
| 127 | 3/7/2017  | neg | na   | <i>Callithrix</i> | epi | urban       | good         | Perdizes                  | -19,35 | -47,29 | Triangulo/Alto Paranaiba |
| 130 | 3/7/2017  | neg | na   | <i>Callithrix</i> | epi | rural       | intermediate | Carmo do Rio Claro        | -20,97 | -46,11 | Sul/Sudoeste de Minas    |
| 111 | 3/8/2017  | neg | na   | <i>Callithrix</i> | epi | urban       | bad          | Ribeirao das Neves        | -19,76 | -44,08 | Metropolitana            |
| 100 | 3/8/2017  | neg | na   | <i>Callithrix</i> | epi | rural       | good         | Ouro Branco               | -20,52 | -43,69 | Metropolitana            |
| 129 | 3/8/2017  | neg | na   | <i>Callithrix</i> | epi | urban       | intermediate | Alpinopolis               | -20,86 | -46,38 | Sul/Sudoeste de Minas    |
| 131 | 3/8/2017  | neg | na   | <i>Callithrix</i> | epi | urban       | intermediate | Ibirite                   | -20,02 | -44,05 | Metropolitana            |
| 124 | 3/9/2017  | pos | 36   | <i>Callithrix</i> | epi | rural       | good         | Sao Goncalo do Rio Abaixo | -19,82 | -43,36 | Metropolitana            |
| 123 | 3/9/2017  | neg | na   | <i>Callithrix</i> | epi | urban       | good         | Congonhas                 | -20,5  | -43,85 | Metropolitana            |
| 168 | 3/10/2017 | pos | 30.2 | na                | epi | urban       | good         | Belo Horizonte            | -19,81 | -43,95 | Metropolitana            |
| 116 | 3/10/2017 | neg | na   | <i>Callithrix</i> | epi | urban       | good         | Betim                     | -19,96 | -44,19 | Metropolitana            |
| 120 | 3/10/2017 | neg | na   | <i>Callithrix</i> | epi | urban-rural | good         | Sao Goncalo do Rio Abaixo | -19,82 | -43,36 | Metropolitana            |
| 113 | 3/10/2017 | neg | na   | <i>Callithrix</i> | epi | urban-      | good         | Itaverava                 | -20,67 | -43,61 | Metropolitana            |

|     |           |     |      |                   |     | rural       |              |                        |        |        |                          |  |
|-----|-----------|-----|------|-------------------|-----|-------------|--------------|------------------------|--------|--------|--------------------------|--|
| 117 | 3/13/2017 | pos | 36   | <i>Callithrix</i> | epi | urban       | intermediate | Mateus Leme            | -19,98 | -44,42 | Metropolitana            |  |
| 121 | 3/13/2017 | neg | na   | <i>Callithrix</i> | epi | urban-rural | intermediate | Santa Luzia            | -19,77 | -43,85 | Metropolitana            |  |
| 197 | 3/14/2017 | pos | 29   | <i>Callithrix</i> | epi | rural       | good         | Visconde do Rio Branco | -21,01 | -42,84 | Zona da Mata             |  |
| 189 | 3/14/2017 | pos | 34   | <i>Callithrix</i> | epi | urban       | good         | Nacip Raydan           | -18,45 | -42,24 | Vale do Rio Doce         |  |
| 122 | 3/14/2017 | pos | 12.6 | <i>Alouatta</i>   | epi | urban       | good         | Senador Jose Bento     | -22,16 | -46,17 | Sul/Sudoeste de Minas    |  |
| 118 | 3/14/2017 | pos | 33.5 | <i>Callithrix</i> | epi | urban-rural | intermediate | Lagoa Santa            | -19,62 | -43,89 | Metropolitana            |  |
| 167 | 3/14/2017 | pos | 7.9  | <i>Callicebus</i> | epi | rural       | intermediate | Fervedouro             | -20,72 | -42,27 | Zona da Mata             |  |
| 190 | 3/14/2017 | neg | na   | <i>Callithrix</i> | epi | urban       | bad          | Governador Valadares   | -18,85 | -41,94 | Vale do Rio Doce         |  |
| 244 | 3/14/2017 | neg | na   | <i>Callithrix</i> | epi | urban       | good         | Sabara                 | -19,88 | -43,8  | Metropolitana            |  |
| 217 | 3/14/2017 | neg | na   | <i>Callithrix</i> | epi | urban       | intermediate | Governador Valadares   | -18,85 | -41,94 | Vale do Rio Doce         |  |
| 239 | 3/14/2017 | neg | na   | <i>Callithrix</i> | epi | urban       | intermediate | Governador Valadares   | -18,85 | -41,94 | Vale do Rio Doce         |  |
| 56  | 3/15/2017 | pos | 8    | <i>Callicebus</i> | epi | rural       | intermediate | Andradas               | -22,06 | -46,56 | Sul/Sudoeste de Minas    |  |
| 191 | 3/15/2017 | pos | 36   | <i>Callithrix</i> | epi | rural       | intermediate | Bonfinopolis de Minas  | -16,56 | -45,99 | Noroeste de Minas        |  |
| 193 | 3/15/2017 | pos | 37   | <i>Callithrix</i> | epi | rural       | intermediate | Cabeceira Grande       | -16,03 | -47,09 | Noroeste de Minas        |  |
| 141 | 3/15/2017 | pos | 14.3 | <i>Alouatta</i>   | epi | rural       | good         | Santa Rita de Caldas   | -22,02 | -46,33 | Sul/Sudoeste de Minas    |  |
| 196 | 3/15/2017 | pos | 32.4 | <i>Callithrix</i> | epi | urban       | good         | Alem Paraiba           | -21,88 | -42,7  | Zona da Mata             |  |
| 60  | 3/16/2017 | pos | 37   | <i>Callithrix</i> | epi | urban       | good         | Vicosa                 | -20,75 | -42,88 | Zona da Mata             |  |
| 156 | 3/16/2017 | pos | 36.5 | <i>Callithrix</i> | epi | rural       | intermediate | Senhora dos Remedios   | -21,02 | -43,58 | Campo das Vertentes      |  |
| 59  | 3/16/2017 | neg | na   | <i>Callicebus</i> | epi | rural       | good         | Guimarania             | -18,84 | -46,79 | Triangulo/Alto Paranaiba |  |
| 53  | 3/16/2017 | neg | na   | <i>Callithrix</i> | epi | rural       | good         | Curvelo                | -18,75 | -44,43 | Central Mineira          |  |
| 55  | 3/16/2017 | neg | na   | <i>Callithrix</i> | epi | rural       | good         | Goiana                 | -21,53 | -43,2  | Zona da Mata             |  |
| 164 | 3/16/2017 | neg | na   | <i>Callithrix</i> | epi | urban       | good         | Dores de Guanhaes      | -19,05 | -42,92 | Vale do Rio Doce         |  |
| 54  | 3/16/2017 | neg | na   | <i>Callithrix</i> | epi | urban       | good         | Tocantins              | -21,17 | -43,01 | Zona da Mata             |  |

|     |           |     |      |                   |     |             |              |                           |        |        |                          |
|-----|-----------|-----|------|-------------------|-----|-------------|--------------|---------------------------|--------|--------|--------------------------|
| 57  | 3/16/2017 | neg | na   | <i>Callithrix</i> | epi | urban-rural | good         | Brumadinho                | -20,14 | -44,2  | Metropolitana            |
| 58  | 3/16/2017 | neg | na   | <i>Callithrix</i> | epi | urban-rural | good         | Brumadinho                | -20,14 | -44,2  | Metropolitana            |
| 61  | 3/16/2017 | neg | na   | <i>Callithrix</i> | epi | rural       | intermediate | Romaria                   | -18,88 | -47,58 | Triangulo/Alto Paranaiba |
| 62  | 3/16/2017 | neg | na   | <i>Callithrix</i> | epi | rural       | intermediate | Uberlandia                | -18,91 | -48,27 | Triangulo/Alto Paranaiba |
| 52  | 3/16/2017 | neg | na   | <i>Callithrix</i> | epi | urban       | intermediate | Curvelo                   | -18,75 | -44,43 | Central Mineira          |
| 215 | 3/17/2017 | pos | 33   | <i>Callithrix</i> | epi | urban       | good         | Belo Horizonte            | -19,81 | -43,95 | Metropolitana            |
| 157 | 3/17/2017 | pos | 33.4 | <i>Callicebus</i> | epi | urban       | na           | Mateus Leme               | -19,98 | -44,42 | Metropolitana            |
| 243 | 3/17/2017 | neg | na   | <i>Callithrix</i> | epi | rural       | good         | Sao Goncalo do Rio Abaixo | -19,82 | -43,36 | Metropolitana            |
| 158 | 3/17/2017 | neg | na   | <i>Callithrix</i> | epi | urban       | good         | Mario Campos              | -20,05 | -44,18 | Metropolitana            |
| 152 | 3/17/2017 | neg | na   | <i>Callithrix</i> | epi | urban       | intermediate | Itabirito                 | -20,25 | -43,8  | Metropolitana            |
| 159 | 3/17/2017 | neg | na   | <i>Callithrix</i> | epi | urban       | intermediate | Sabara                    | -19,88 | -43,8  | Metropolitana            |
| 134 | 3/20/2017 | pos | 33   | <i>Callithrix</i> | epi | rural       | intermediate | Governador Valadares      | -18,85 | -41,94 | Vale do Rio Doce         |
| 66  | 3/20/2017 | pos | 35   | <i>Callithrix</i> | epi | rural       | good         | Santa Luzia               | -19,77 | -43,85 | Metropolitana            |
| 64  | 3/20/2017 | pos | 33.5 | <i>Callithrix</i> | epi | urban       | good         | Belo Horizonte            | -19,81 | -43,95 | Metropolitana            |
| 63  | 3/20/2017 | neg | na   | <i>Callithrix</i> | epi | rural       | good         | Sete Lagoas               | -19,46 | -44,24 | Metropolitana            |
| 133 | 3/20/2017 | neg | na   | <i>Callithrix</i> | epi | urban       | good         | Cataguases                | -21,38 | -42,69 | Zona da Mata             |
| 140 | 3/20/2017 | neg | na   | <i>Alouatta</i>   | epi | rural       | intermediate | Marlheria                 | -19,71 | -42,73 | Vale do Rio Doce         |
| 65  | 3/20/2017 | neg | na   | <i>Callithrix</i> | epi | urban       | intermediate | Belo Horizonte            | -19,81 | -43,95 | Metropolitana            |
| 68  | 3/20/2017 | neg | na   | <i>Callithrix</i> | epi | urban       | intermediate | Recreio                   | -21,52 | -42,46 | Zona da Mata             |
| 138 | 3/21/2017 | pos | 32   | <i>Callithrix</i> | epi | urban       | good         | Ribeirao das Neves        | -19,76 | -44,08 | Metropolitana            |
| 135 | 3/21/2017 | pos | 33.3 | <i>Callithrix</i> | epi | urban       | good         | Belo Horizonte            | -19,81 | -43,95 | Metropolitana            |
| 137 | 3/21/2017 | neg | na   | <i>Callithrix</i> | epi | urban       | good         | Itabirito                 | -20,25 | -43,8  | Metropolitana            |
| 269 | 3/22/2017 | pos | 28.6 | <i>Callithrix</i> | epi | urban-rural | intermediate | Vespasiano                | -19,69 | -43,92 | Metropolitana            |
| 246 | 3/22/2017 | neg | na   | <i>Callithrix</i> | epi | urban       | bad          | Araguari                  | -18,64 | -48,18 | Triangulo/Alto Paranaiba |

|     |           |     |      |                   |     |       |              |                    |        |        |                          |
|-----|-----------|-----|------|-------------------|-----|-------|--------------|--------------------|--------|--------|--------------------------|
| 257 | 3/22/2017 | neg | na   | <i>Callithrix</i> | epi | urban | bad          | Corinto            | -18,38 | -44,45 | Central Mineira          |
| 238 | 3/22/2017 | neg | na   | <i>Alouatta</i>   | epi | rural | good         | Borda da Mata      | -22,27 | -46,16 | Sul/Sudoeste de Minas    |
| 259 | 3/22/2017 | neg | na   | <i>Callithrix</i> | epi | urban | good         | Sao Joao Del Rei   | -21,13 | -44,26 | Campo das Vertentes      |
| 249 | 3/22/2017 | neg | na   | <i>Callithrix</i> | epi | rural | intermediate | Paraopeba          | -19,27 | -44,4  | Metropolitana            |
| 253 | 3/22/2017 | neg | na   | <i>Callithrix</i> | epi | urban | intermediate | Vespasiano         | -19,69 | -43,92 | Metropolitana            |
| 204 | 3/23/2017 | neg | na   | <i>Callithrix</i> | epi | urban | good         | Carmo do Rio Claro | -20,97 | -46,11 | Sul/Sudoeste de Minas    |
| 207 | 3/23/2017 | neg | na   | <i>Callithrix</i> | epi | urban | good         | Sabara             | -19,88 | -43,8  | Metropolitana            |
| 150 | 3/24/2017 | pos | 34   | <i>Callithrix</i> | epi | rural | intermediate | Santa Luzia        | -19,77 | -43,85 | Metropolitana            |
| 143 | 3/24/2017 | pos | 36   | <i>Callithrix</i> | epi | rural | na           | Belo Horizonte     | -19,81 | -43,95 | Metropolitana            |
| 145 | 3/24/2017 | neg | na   | <i>Callithrix</i> | epi | urban | good         | Muriae             | -21,13 | -42,36 | Zona da Mata             |
| 144 | 3/24/2017 | neg | na   | <i>Callithrix</i> | epi | rural | good         | Belo Horizonte     | -19,81 | -43,95 | Metropolitana            |
| 142 | 3/24/2017 | neg | na   | <i>Callithrix</i> | epi | rural | good         | Belo Horizonte     | -19,81 | -43,95 | Metropolitana            |
| 149 | 3/24/2017 | neg | na   | <i>Callithrix</i> | epi | rural | good         | Inimutaba          | -18,72 | -44,36 | Central Mineira          |
| 147 | 3/26/2017 | pos | 36.6 | <i>Callithrix</i> | epi | urban | intermediate | Belo Horizonte     | -19,81 | -43,95 | Metropolitana            |
| 148 | 3/26/2017 | neg | na   | <i>Callithrix</i> | epi | urban | intermediate | Belo Horizonte     | -19,81 | -43,95 | Metropolitana            |
| 165 | 3/28/2017 | neg | na   | <i>Callicebus</i> | epi | rural | good         | Capitolio          | -20,61 | -46,05 | Sul/Sudoeste de Minas    |
| 154 | 3/28/2017 | neg | na   | <i>Callithrix</i> | epi | rural | good         | Contagem           | -19,93 | -44,05 | Metropolitana            |
| 219 | 3/28/2017 | neg | na   | <i>Callithrix</i> | epi | urban | good         | Contagem           | -19,93 | -44,05 | Metropolitana            |
| 146 | 3/28/2017 | neg | na   | <i>Callithrix</i> | epi | urban | good         | Sarzedo            | -20,03 | -44,14 | Metropolitana            |
| 245 | 3/29/2017 | neg | na   | <i>Callithrix</i> | epi | urban | good         | Patrocinio         | -18,94 | -46,99 | Triangulo/Alto Paranaiba |
| 214 | 3/30/2017 | pos | 36   | <i>Callithrix</i> | epi | urban | good         | Mario Campos       | -20,05 | -44,18 | Metropolitana            |
| 153 | 3/30/2017 | neg | na   | <i>Callithrix</i> | epi | rural | good         | Felixlandia        | -18,75 | -44,89 | Central Mineira          |
| 182 | 4/3/2017  | pos | 31   | <i>Callithrix</i> | epi | rural | good         | Jaboticatubas      | -19,51 | -43,74 | Metropolitana            |

|     |          |     |      |                   |     |             |              |                        |        |        |                          |
|-----|----------|-----|------|-------------------|-----|-------------|--------------|------------------------|--------|--------|--------------------------|
| 172 | 4/3/2017 | neg | na   | <i>Callithrix</i> | epi | rural       | bad          | Morada Nova de Minas   | -18,6  | -45,35 | Central Mineira          |
| 175 | 4/3/2017 | neg | na   | <i>Callithrix</i> | epi | urban-rural | good         | Santa Luzia            | -19,77 | -43,85 | Metropolitana            |
| 174 | 4/3/2017 | neg | na   | <i>Callicebus</i> | epi | rural       | intermediate | Santo Antonio do Gama  | -20,31 | -42,6  | Zona da Mata             |
| 170 | 4/3/2017 | neg | na   | <i>Callithrix</i> | epi | urban       | intermediate | Contagem               | -19,93 | -44,05 | Metropolitana            |
| 173 | 4/4/2017 | neg | na   | <i>Callithrix</i> | epi | urban       | good         | Ibirite                | -20,02 | -44,05 | Metropolitana            |
| 405 | 4/4/2017 | neg | na   | <i>Callicebus</i> | epi | rural       | intermediate | Pedro Teixeira         | -21,7  | -43,74 | Zona da Mata             |
| 263 | 4/4/2017 | neg | na   | <i>Callithrix</i> | epi | urban-rural | intermediate | Visconde do Rio Branco | -21,01 | -42,84 | Zona da Mata             |
| 216 | 4/5/2017 | pos | 35   | <i>Callithrix</i> | epi | urban       | good         | Lagoa da Prata         | -20,02 | -45,54 | Central Mineira          |
| 161 | 4/5/2017 | pos | 10.2 | <i>Alouatta</i>   | epi | rural       | good         | Congonhal              | -22,15 | -46,03 | Sul/Sudoeste de Minas    |
| 162 | 4/5/2017 | pos | 11.6 | <i>Alouatta</i>   | epi | rural       | na           | Bom Repouso            | -22,47 | -46,14 | Sul/Sudoeste de Minas    |
| 169 | 4/5/2017 | pos | 36.9 | <i>Callithrix</i> | epi | urban       | na           | Araguari               | -18,64 | -48,18 | Triangulo/Alto Paranaiba |
| 176 | 4/5/2017 | pos | 8.7  | <i>Callicebus</i> | epi | rural       | na           | Sao Tiago              | -20,91 | -44,5  | Campo das Vertentes      |
| 248 | 4/5/2017 | neg | na   | <i>Callithrix</i> | epi | urban       | intermediate | Betim                  | -19,96 | -44,19 | Metropolitana            |
| 178 | 4/5/2017 | neg | na   | <i>Callicebus</i> | epi | rural       | na           | Andradas               | -22,06 | -46,56 | Sul/Sudoeste de Minas    |
| 171 | 4/5/2017 | neg | na   | <i>Callithrix</i> | epi | urban       | na           | Uberlandia             | -18,91 | -48,27 | Triangulo/Alto Paranaiba |
| 180 | 4/5/2017 | neg | na   | <i>Callithrix</i> | epi | urban       | na           | Uberlandia             | -18,91 | -48,27 | Triangulo/Alto Paranaiba |
| 181 | 4/5/2017 | neg | na   | <i>Callithrix</i> | epi | urban       | na           | Uberlandia             | -18,91 | -48,27 | Triangulo/Alto Paranaiba |
| 177 | 4/5/2017 | neg | na   | <i>Callithrix</i> | epi | urban-rural | na           | Betim                  | -19,96 | -44,19 | Metropolitana            |
| 179 | 4/6/2017 | pos | 26.5 | <i>Callithrix</i> | epi | urban       | good         | Betim                  | -19,96 | -44,19 | Metropolitana            |
| 166 | 4/6/2017 | pos | 29.6 | <i>Alouatta</i>   | epi | urban       | good         | Alem Paraiba           | -21,88 | -42,7  | Zona da Mata             |
| 240 | 4/6/2017 | neg | na   | <i>Callithrix</i> | epi | urban       | bad          | Santa Luzia            | -19,77 | -43,85 | Metropolitana            |
| 241 | 4/6/2017 | neg | na   | <i>Callithrix</i> | epi | urban-rural | good         | Pedro Leopoldo         | -19,61 | -44,04 | Metropolitana            |
| 250 | 4/6/2017 | neg | na   | <i>Callithrix</i> | epi | urban       | intermediate | Contagem               | -19,93 | -44,05 | Metropolitana            |



|     |           |     |      |                   |     |                  |              |                 |        |        |                          |
|-----|-----------|-----|------|-------------------|-----|------------------|--------------|-----------------|--------|--------|--------------------------|
| 183 | 4/6/2017  | neg | na   | <i>Callithrix</i> | epi | rural            | na           | Jampruca        | -18,46 | -41,8  | Vale do Rio Doce         |
| 266 | 4/7/2017  | pos | 10.3 | <i>Callithrix</i> | epi | urban            | intermediate | Sao Tiago       | -20,91 | -44,5  | Campo das Vertentes      |
| 265 | 4/7/2017  | pos | 9.7  | <i>Callithrix</i> | epi | urban-<br>urban- | intermediate | Sao Tiago       | -20,91 | -44,5  | Campo das Vertentes      |
| 247 | 4/7/2017  | neg | na   | <i>Callithrix</i> | epi | rural            | intermediate | Augusto de Lima | -18,1  | -44,26 | Central Mineira          |
| 205 | 4/10/2017 | neg | na   | <i>Callithrix</i> | epi | rural            | good         | Jaboticatubas   | -19,51 | -43,74 | Metropolitana            |
| 209 | 4/10/2017 | neg | na   | <i>Callithrix</i> | epi | urban            | good         | Sao Francisco   | -15,94 | -44,86 | Norte de Minas           |
| 208 | 4/10/2017 | neg | na   | <i>Callithrix</i> | epi | urban            | good         | Sao Francisco   | -15,94 | -44,86 | Norte de Minas           |
| 185 | 4/10/2017 | neg | na   | <i>Alouatta</i>   | epi | rural            | intermediate | Icarai de Minas | -16,21 | -44,9  | Norte de Minas           |
| 210 | 4/10/2017 | neg | na   | <i>Callithrix</i> | epi | rural            | intermediate | Betim           | -19,96 | -44,19 | Metropolitana            |
| 194 | 4/11/2017 | pos | 31   | <i>Alouatta</i>   | epi | rural            | good         | Congonhal       | -22,15 | -46,03 | Sul/Sudoeste de Minas    |
| 268 | 4/11/2017 | pos | 32.7 | <i>Callithrix</i> | epi | rural            | intermediate | Claudio         | -20,44 | -44,76 | Oeste de Minas           |
| 192 | 4/11/2017 | pos | 34.5 | <i>Callithrix</i> | epi | rural            | good         | Itabirito       | -20,25 | -43,8  | Metropolitana            |
| 313 | 4/11/2017 | pos | 35.5 | <i>Callithrix</i> | epi | urban            | good         | Belo Horizonte  | -19,81 | -43,95 | Metropolitana            |
| 186 | 4/11/2017 | pos | 8.9  | <i>Alouatta</i>   | epi | rural            | good         | Congonhal       | -22,15 | -46,03 | Sul/Sudoeste de Minas    |
| 319 | 4/11/2017 | neg | na   | <i>Callithrix</i> | epi | urban            | intermediate | Ituiutaba       | -18,96 | -49,46 | Triangulo/Alto Paranaiba |
| 213 | 4/12/2017 | pos | 10   | <i>Callicebus</i> | epi | rural            | good         | Igaratinga      | -19,95 | -44,7  | Oeste de Minas           |
| 310 | 4/12/2017 | pos | 35.9 | <i>Callithrix</i> | epi | urban            | bad          | Nova Uniao      | -19,69 | -43,58 | Metropolitana            |
| 308 | 4/12/2017 | neg | na   | <i>Callithrix</i> | epi | urban            | bad          | Belo Horizonte  | -19,81 | -43,95 | Metropolitana            |
| 211 | 4/12/2017 | neg | na   | <i>Callithrix</i> | epi | urban            | bad          | Para de Minas   | -19,86 | -44,6  | Metropolitana            |
| 203 | 4/12/2017 | neg | na   | <i>Callithrix</i> | epi | urban            | good         | Belo Horizonte  | -19,81 | -43,95 | Metropolitana            |
| 202 | 4/12/2017 | neg | na   | <i>Callithrix</i> | epi | urban            | intermediate | Divinopolis     | -20,13 | -44,88 | Oeste de Minas           |
| 187 | 4/12/2017 | neg | na   | <i>Callithrix</i> | epi | urban-<br>urban- | na           | Divinopolis     | -20,13 | -44,88 | Oeste de Minas           |
| 201 | 4/13/2017 | pos | 36.2 | <i>Callithrix</i> | epi | rural            | intermediate | Itatiaiuçu      | -20,19 | -44,42 | Metropolitana            |
| 212 | 4/13/2017 | neg | na   | <i>Callithrix</i> | epi | rural            | good         | Rio Piracicaba  | -19,92 | -43,17 | Metropolitana            |

|     |           |     |      |                   |     |                  |              |                       |        |        |                          |
|-----|-----------|-----|------|-------------------|-----|------------------|--------------|-----------------------|--------|--------|--------------------------|
| 267 | 4/17/2017 | pos | 32.1 | <i>Callithrix</i> | epi | rural            | intermediate | Vespasiano            | -19,69 | -43,92 | Metropolitana            |
| 261 | 4/17/2017 | neg | na   | <i>Callithrix</i> | epi | urban            | good         | Brumadinho            | -20,14 | -44,2  | Metropolitana            |
| 242 | 4/17/2017 | neg | na   | <i>Callithrix</i> | epi | urban            | intermediate | Bom Despacho          | -19,73 | -45,25 | Central Mineira          |
| 184 | 4/18/2017 | pos | 16.4 | <i>Alouatta</i>   | epi | rural            | intermediate | Rio Doce              | -20,24 | -42,9  | Zona da Mata             |
| 366 | 4/18/2017 | neg | na   | <i>Callithrix</i> | epi | urban            | good         | Sao Joaquim de Bicas  | -20,04 | -44,27 | Metropolitana            |
| 315 | 4/18/2017 | neg | na   | <i>Callithrix</i> | epi | urban            | good         | Ribeirao das Neves    | -19,76 | -44,08 | Metropolitana            |
| 188 | 4/19/2017 | pos | 13   | <i>Alouatta</i>   | epi | rural            | intermediate | Congonhal             | -22,15 | -46,03 | Sul/Sudoeste de Minas    |
| 236 | 4/19/2017 | pos | 13   | <i>Alouatta</i>   | epi | rural            | intermediate | Congonhal             | -22,15 | -46,03 | Sul/Sudoeste de Minas    |
| 274 | 4/19/2017 | pos | 15.2 | <i>Alouatta</i>   | epi | rural            | good         | Senador Amaral        | -22,58 | -46,17 | Sul/Sudoeste de Minas    |
| 252 | 4/19/2017 | neg | na   | <i>Callithrix</i> | epi | urban            | good         | Belo Horizonte        | -19,81 | -43,95 | Metropolitana            |
| 254 | 4/19/2017 | neg | na   | <i>Callithrix</i> | epi | urban            | intermediate | Sete Lagoas           | -19,46 | -44,24 | Metropolitana            |
| 314 | 4/20/2017 | pos | 33.8 | <i>Callithrix</i> | epi | rural            | bad          | Nova Lima             | -19,98 | -43,84 | Metropolitana            |
| 318 | 4/20/2017 | neg | na   | <i>Callithrix</i> | epi | rural            | bad          | Sao Domingos do Prata | -19,86 | -42,96 | Metropolitana            |
| 251 | 4/20/2017 | neg | na   | <i>Callithrix</i> | epi | rural            | good         | Cajuri                | -20,79 | -42,79 | Zona da Mata             |
| 163 | 4/20/2017 | neg | na   | <i>Callithrix</i> | epi | urban            | good         | Belo Horizonte        | -19,81 | -43,95 | Metropolitana            |
| 309 | 4/20/2017 | neg | na   | <i>Callithrix</i> | epi | urban            | good         | Nova Lima             | -19,98 | -43,84 | Metropolitana            |
| 321 | 4/20/2017 | neg | na   | <i>Callithrix</i> | epi | urban            | intermediate | Nova Lima             | -19,98 | -43,84 | Metropolitana            |
| 200 | 4/24/2017 | pos | 36.5 | <i>Callithrix</i> | epi | urban-<br>urban- | bad          | Ribeirao das Neves    | -19,76 | -44,08 | Metropolitana            |
| 195 | 4/25/2017 | pos | 35   | <i>Callithrix</i> | epi | rural            | good         | Itabirito             | -20,25 | -43,8  | Metropolitana            |
| 272 | 4/26/2017 | neg | na   | <i>Callicebus</i> | epi | rural            | good         | Coronel Xavier Chaves | -21,02 | -44,22 | Campo das Vertentes      |
| 230 | 4/26/2017 | neg | na   | <i>Callithrix</i> | epi | rural            | good         | Patrocinio de Muriae  | -21,15 | -42,21 | Zona da Mata             |
| 221 | 4/26/2017 | neg | na   | <i>Callithrix</i> | epi | urban            | good         | Monte Carmelo         | -18,72 | -47,49 | Triangulo/Alto Paranaiba |
| 226 | 4/26/2017 | neg | na   | <i>Callithrix</i> | epi | urban            | good         | Sabara                | -19,88 | -43,8  | Metropolitana            |
| 220 | 4/26/2017 | neg | na   | <i>Callithrix</i> | epi | rural            | intermediate | Presidente Juscelino  | -18,63 | -44,05 | Central Mineira          |

|     |           |     |      |                   |     |             |              |                      |        |        |                          |
|-----|-----------|-----|------|-------------------|-----|-------------|--------------|----------------------|--------|--------|--------------------------|
| 223 | 4/26/2017 | neg | na   | <i>Callithrix</i> | epi | urban       | intermediate | Belo Horizonte       | -19,81 | -43,95 | Metropolitana            |
| 222 | 4/26/2017 | neg | na   | <i>Callithrix</i> | epi | urban-rural | intermediate | Itajuba              | -22,42 | -45,45 | Sul/Sudoeste de Minas    |
| 228 | 4/27/2017 | neg | na   | <i>Callithrix</i> | epi | urban       | intermediate | Belo Oriente         | -19,22 | -42,48 | Vale do Rio Doce         |
| 233 | 5/2/2017  | neg | na   | <i>Callithrix</i> | epi | rural       | good         | Nova Uniao           | -19,69 | -43,58 | Metropolitana            |
| 232 | 5/2/2017  | neg | na   | <i>Callithrix</i> | epi | urban       | good         | Cataguases           | -21,38 | -42,69 | Zona da Mata             |
| 275 | 5/2/2017  | neg | na   | <i>Callithrix</i> | epi | urban       | good         | Belo Horizonte       | -19,81 | -43,95 | Metropolitana            |
| 227 | 5/3/2017  | neg | na   | <i>Callithrix</i> | epi | urban       | good         | Uberlandia           | -18,91 | -48,27 | Triangulo/Alto Paranaiba |
| 224 | 5/3/2017  | neg | na   | <i>Callithrix</i> | epi | urban       | good         | Belo Horizonte       | -19,81 | -43,95 | Metropolitana            |
| 235 | 5/3/2017  | neg | na   | <i>Callithrix</i> | epi | urban       | good         | Sao Joao Del Rei     | -21,13 | -44,26 | Campo das Vertentes      |
| 229 | 5/3/2017  | neg | na   | <i>Callithrix</i> | epi | urban       | intermediate | Buenopolis           | -17,87 | -44,18 | Central Mineira          |
| 237 | 5/5/2017  | pos | 11   | <i>Alouatta</i>   | epi | rural       | intermediate | Rio Doce             | -20,24 | -42,9  | Zona da Mata             |
| 225 | 5/5/2017  | neg | na   | <i>Callithrix</i> | epi | urban       | intermediate | Belo Horizonte       | -19,81 | -43,95 | Metropolitana            |
| 234 | 5/8/2017  | pos | 36.3 | <i>Callithrix</i> | epi | rural       | intermediate | Bom Jesus da Penha   | -21,01 | -46,52 | Sul/Sudoeste de Minas    |
| 231 | 5/8/2017  | neg | na   | <i>Callithrix</i> | epi | urban       | good         | Cataguases           | -21,38 | -42,69 | Zona da Mata             |
| 279 | 5/9/2017  | pos | 35.5 | <i>Callithrix</i> | epi | urban       | intermediate | Nova Lima            | -19,98 | -43,84 | Metropolitana            |
| 294 | 5/9/2017  | neg | na   | <i>Callithrix</i> | epi | urban       | good         | Ribeirao das Neves   | -19,76 | -44,08 | Metropolitana            |
| 271 | 5/9/2017  | neg | na   | <i>Alouatta</i>   | epi | rural       | intermediate | Santa Juliana        | -19,3  | -47,52 | Triangulo/Alto Paranaiba |
| 276 | 5/9/2017  | neg | na   | <i>Callithrix</i> | epi | urban       | intermediate | Coronel Fabriciano   | -19,51 | -42,62 | Vale do Rio Doce         |
| 277 | 5/9/2017  | neg | na   | <i>Callithrix</i> | epi | urban       | intermediate | Governador Valadares | -18,85 | -41,94 | Vale do Rio Doce         |
| 293 | 5/9/2017  | neg | na   | <i>Callithrix</i> | epi | urban       | na           | Carneirinho          | -19,69 | -50,68 | Triangulo/Alto Paranaiba |
| 611 | 5/11/2017 | neg | na   | <i>Callithrix</i> | epi | urban       | good         | Belo Horizonte       | -19,81 | -43,95 | Metropolitana            |
| 609 | 5/11/2017 | neg | na   | <i>Callithrix</i> | epi | urban       | intermediate | Belo Horizonte       | -19,81 | -43,95 | Metropolitana            |
| 612 | 5/12/2017 | neg | na   | <i>Callithrix</i> | epi | urban       | good         | Belo Horizonte       | -19,81 | -43,95 | Metropolitana            |
| 258 | 5/12/2017 | neg | na   | <i>Callithrix</i> | epi | urban       | good         | Santa Luzia          | -19,77 | -43,85 | Metropolitana            |

|     |           |     |      |                   |         |             |              |                          |        |        |                          |
|-----|-----------|-----|------|-------------------|---------|-------------|--------------|--------------------------|--------|--------|--------------------------|
| 264 | 5/12/2017 | neg | na   | <i>Callithrix</i> | epi     | urban       | good         | Santa Luzia              | -19,77 | -43,85 | Metropolitana            |
| 255 | 5/15/2017 | neg | na   | <i>Callithrix</i> | epi     | rural       | good         | Inhauma                  | -19,49 | -44,39 | Metropolitana            |
| 260 | 5/15/2017 | neg | na   | <i>Callithrix</i> | epi     | urban       | good         | Nova Lima                | -19,98 | -43,84 | Metropolitana            |
| 290 | 5/16/2017 | pos | 36   | <i>Callithrix</i> | epi     | urban-rural | intermediate | Natalandia               | -16,5  | -46,49 | Noroeste de Minas        |
| 262 | 5/16/2017 | neg | na   | <i>Callithrix</i> | epi     | urban       | good         | Sabara                   | -19,88 | -43,8  | Metropolitana            |
| 256 | 5/16/2017 | neg | na   | <i>Callithrix</i> | epi     | urban       | intermediate | Jequitiba                | -19,23 | -44,02 | Metropolitana            |
| 291 | 5/17/2017 | pos | 29.5 | <i>Callithrix</i> | epi     | urban       | na           | Patos de Minas           | -18,57 | -46,51 | Triangulo/Alto Paranaiba |
| 608 | 5/23/2017 | neg | na   | <i>Callithrix</i> | epi     | urban       | intermediate | Brumadinho               | -20,14 | -44,2  | Metropolitana            |
| 398 | 5/24/2017 | pos | 34.2 | <i>Callithrix</i> | epi     | urban       | good         | Belo Horizonte           | -19,81 | -43,95 | Metropolitana            |
| 396 | 5/24/2017 | neg | na   | <i>Callithrix</i> | epi     | urban       | bad          | Itajuba                  | -22,42 | -45,45 | Sul/Sudoeste de Minas    |
| 397 | 5/25/2017 | pos | 33.3 | <i>Callithrix</i> | epi     | urban       | intermediate | Presidente Bernardes     | -20,76 | -43,18 | Zona da Mata             |
| 402 | 5/26/2017 | pos | 33.8 | <i>Callithrix</i> | epi     | rural       | na           | Ouro Preto               | -20,28 | -43,5  | Metropolitana            |
| 613 | 6/5/2017  | neg | na   | <i>Callithrix</i> | non-epi | urban       | bad          | Belo Horizonte           | -19,81 | -43,95 | Metropolitana            |
| 403 | 6/5/2017  | neg | na   | <i>Callithrix</i> | non-epi | rural       | good         | Nova Lima                | -19,98 | -43,84 | Metropolitana            |
| 401 | 6/5/2017  | neg | na   | <i>Callithrix</i> | non-epi | urban       | good         | Santa Luzia              | -19,77 | -43,85 | Metropolitana            |
| 400 | 6/6/2017  | pos | 36.3 | <i>Callithrix</i> | non-epi | urban       | good         | Cataguases               | -21,38 | -42,69 | Zona da Mata             |
| 399 | 6/6/2017  | neg | na   | <i>Callithrix</i> | non-epi | urban       | intermediate | Itajuba                  | -22,42 | -45,45 | Sul/Sudoeste de Minas    |
| 289 | 6/7/2017  | neg | na   | <i>Callithrix</i> | non-epi | urban       | good         | Uberlandia               | -18,91 | -48,27 | Triangulo/Alto Paranaiba |
| 287 | 6/7/2017  | neg | na   | <i>Callithrix</i> | non-epi | rural       | intermediate | Sao Goncalo do Rio Preto | -18    | -43,39 | Jequitinhonha            |
| 286 | 6/7/2017  | neg | na   | <i>Callithrix</i> | non-epi | urban-rural | intermediate | Uberlandia               | -18,91 | -48,27 | Triangulo/Alto Paranaiba |
| 284 | 6/8/2017  | neg | na   | <i>Callithrix</i> | non-epi | rural       | na           | Santa Luzia              | -19,77 | -43,85 | Metropolitana            |
| 283 | 6/13/2017 | neg | na   | <i>Callithrix</i> | non-epi | urban       | na           | Belo Horizonte           | -19,81 | -43,95 | Metropolitana            |
| 282 | 6/14/2017 | neg | na   | <i>Callithrix</i> | non-epi | urban       | bad          | Nova Lima                | -19,98 | -43,84 | Metropolitana            |
| 280 | 6/14/2017 | neg | na   | <i>Callithrix</i> | non-epi | urban       | na           | Itabirito                | -20,25 | -43,8  | Metropolitana            |

|     |           |     |      |                   |         |                 |              |                      |        |        |                          |
|-----|-----------|-----|------|-------------------|---------|-----------------|--------------|----------------------|--------|--------|--------------------------|
| 281 | 6/20/2017 | neg | na   | <i>Callithrix</i> | non-epi | urban           | bad          | Fronteira            | -20,26 | -49,19 | Triangulo/Alto Paranaíba |
| 288 | 6/20/2017 | neg | na   | <i>Callithrix</i> | non-epi | urban           | na           | Governador Valadares | -18,85 | -41,94 | Vale do Rio Doce         |
| 292 | 6/20/2017 | neg | na   | <i>Callithrix</i> | non-epi | urban           | na           | Iturama              | -19,72 | -50,19 | Triangulo/Alto Paranaíba |
| 347 | 6/21/2017 | pos | 12   | <i>Alouatta</i>   | non-epi | rural           | na           | Prados               | -21,05 | -44,08 | Campo das Vertentes      |
| 297 | 6/22/2017 | neg | na   | <i>Callithrix</i> | non-epi | urban           | good         | Belo Horizonte       | -19,81 | -43,95 | Metropolitana            |
| 307 | 6/22/2017 | neg | na   | <i>Callithrix</i> | non-epi | urban           | good         | Uberlandia           | -18,91 | -48,27 | Triangulo/Alto Paranaíba |
| 306 | 6/22/2017 | neg | na   | <i>Callithrix</i> | non-epi | urban           | intermediate | Tupaciguara          | -18,59 | -48,7  | Triangulo/Alto Paranaíba |
| 301 | 6/22/2017 | neg | na   | <i>Callithrix</i> | non-epi | urban           | intermediate | Uberlandia           | -18,91 | -48,27 | Triangulo/Alto Paranaíba |
| 304 | 6/23/2017 | neg | na   | <i>Callithrix</i> | non-epi | na              | good         | DOM BOSCO            | -16,65 | -46,27 | Noroeste de Minas        |
| 302 | 6/23/2017 | neg | na   | <i>Callithrix</i> | non-epi | urban           | intermediate | Sabara               | -19,88 | -43,8  | Metropolitana            |
| 303 | 6/26/2017 | pos | 35   | <i>Callithrix</i> | non-epi | urban           | good         | Belo Horizonte       | -19,81 | -43,95 | Metropolitana            |
| 316 | 6/27/2017 | neg | na   | <i>Callithrix</i> | non-epi | urban           | good         | Vespasiano           | -19,69 | -43,92 | Metropolitana            |
| 317 | 6/27/2017 | neg | na   | <i>Callithrix</i> | non-epi | urban           | intermediate | Vespasiano           | -19,69 | -43,92 | Metropolitana            |
| 320 | 6/28/2017 | pos | 36.3 | <i>Callithrix</i> | non-epi | urban           | good         | Uberlandia           | -18,91 | -48,27 | Triangulo/Alto Paranaíba |
| 312 | 6/28/2017 | neg | na   | <i>Callithrix</i> | non-epi | urban           | good         | Uberlandia           | -18,91 | -48,27 | Triangulo/Alto Paranaíba |
| 311 | 6/28/2017 | neg | na   | <i>Callithrix</i> | non-epi | urban           | good         | Itajuba              | -22,42 | -45,45 | Sul/Sudoeste de Minas    |
| 298 | 6/29/2017 | neg | na   | <i>Callithrix</i> | non-epi | urban           | good         | Matias Barbosa       | -21,86 | -43,31 | Zona da Mata             |
| 305 | 6/29/2017 | neg | na   | <i>Callithrix</i> | non-epi | urban           | good         | Matias Barbosa       | -21,86 | -43,31 | Zona da Mata             |
| 323 | 7/1/2017  | neg | na   | <i>Callithrix</i> | non-epi | urban           | na           | Montes Claros        | -16,73 | -43,86 | Norte de Minas           |
| 345 | 7/4/2017  | pos | 11.5 | <i>Alouatta</i>   | non-epi | rural           | na           | Sao Joao Del Rei     | -21,13 | -44,26 | Campo das Vertentes      |
| 346 | 7/4/2017  | neg | na   | <i>Alouatta</i>   | non-epi | rural           | na           | Sao Joao Del Rei     | -21,13 | -44,26 | Campo das Vertentes      |
| 295 | 7/4/2017  | neg | na   | <i>Callithrix</i> | non-epi | urban-<br>rural | na           | Campos Gerais        | -21,23 | -45,75 | Sul/Sudoeste de Minas    |
| 390 | 7/6/2017  | pos | 26   | <i>Alouatta</i>   | non-epi | rural           | good         | Alem Paraiba         | -21,88 | -42,7  | Zona da Mata             |
| 389 | 7/6/2017  | pos | 20.9 | <i>Alouatta</i>   | non-epi | rural           | good         | Alem Paraiba         | -21,88 | -42,7  | Zona da Mata             |

|     |           |     |      |                   |         |                 |              |                      |        |        |                          |
|-----|-----------|-----|------|-------------------|---------|-----------------|--------------|----------------------|--------|--------|--------------------------|
| 363 | 7/6/2017  | neg | na   | <i>Callithrix</i> | non-epi | urban           | good         | Acaiaca              | -20,36 | -43,14 | Zona da Mata             |
| 360 | 7/7/2017  | neg | na   | <i>Callithrix</i> | non-epi | urban           | good         | Conselheiro Lafaiete | -20,66 | -43,78 | Metropolitana            |
| 361 | 7/13/2017 | neg | na   | <i>Callithrix</i> | non-epi | urban           | good         | Sete Lagoas          | -19,46 | -44,24 | Metropolitana            |
| 348 | 7/13/2017 | neg | na   | <i>Callithrix</i> | non-epi | urban           | na           | Sete Lagoas          | -19,46 | -44,24 | Metropolitana            |
| 349 | 7/13/2017 | neg | na   | <i>Callithrix</i> | non-epi | urban-<br>rural | na           | Sete Lagoas          | -19,46 | -44,24 | Metropolitana            |
| 353 | 7/14/2017 | pos | 34   | <i>Callithrix</i> | non-epi | rural           | na           | Contagem             | -19,93 | -44,05 | Metropolitana            |
| 355 | 7/18/2017 | pos | 36.6 | <i>Callithrix</i> | non-epi | urban           | good         | Teofilo Otoni        | -17,85 | -41,5  | Vale do Mucuri           |
| 329 | 7/21/2017 | neg | na   | <i>Callithrix</i> | non-epi | rural           | na           | Pedro Leopoldo       | -19,61 | -44,04 | Metropolitana            |
| 322 | 7/22/2017 | neg | na   | <i>Callithrix</i> | non-epi | urban           | na           | Montes Claros        | -16,73 | -43,86 | Norte de Minas           |
| 336 | 7/24/2017 | neg | na   | <i>Callithrix</i> | non-epi | urban           | na           | Recreio              | -21,52 | -42,46 | Zona da Mata             |
| 342 | 7/25/2017 | neg | na   | <i>Callithrix</i> | non-epi | urban           | na           | Santa Vitoria        | -18,83 | -50,12 | Triangulo/Alto Paranaiba |
| 324 | 7/25/2017 | neg | na   | <i>Callithrix</i> | non-epi | urban           | na           | Ibirite              | -20,02 | -44,05 | Metropolitana            |
| 333 | 7/27/2017 | neg | na   | <i>Callithrix</i> | non-epi | urban           | good         | Belo Horizonte       | -19,81 | -43,95 | Metropolitana            |
| 337 | 7/28/2017 | neg | na   | <i>Callithrix</i> | non-epi | urban           | na           | Belo Horizonte       | -19,81 | -43,95 | Metropolitana            |
| 331 | 8/1/2017  | neg | na   | <i>Callithrix</i> | non-epi | urban           | na           | Belo Horizonte       | -19,81 | -43,95 | Metropolitana            |
| 341 | 8/2/2017  | neg | na   | <i>Callicebus</i> | non-epi | rural           | good         | Frutal               | -20,02 | -48,94 | Triangulo/Alto Paranaiba |
| 338 | 8/2/2017  | neg | na   | <i>Callithrix</i> | non-epi | rural           | na           | Ouro Preto           | -20,28 | -43,5  | Metropolitana            |
| 335 | 8/9/2017  | neg | na   | <i>Callithrix</i> | non-epi | rural           | good         | Moeda                | -20,33 | -44,05 | Metropolitana            |
| 326 | 8/9/2017  | neg | na   | <i>Callithrix</i> | non-epi | urban           | na           | Uberlandia           | -18,91 | -48,27 | Triangulo/Alto Paranaiba |
| 384 | 8/18/2017 | neg | na   | <i>Callithrix</i> | non-epi | urban           | bad          | Nova Modica          | -18,43 | -41,5  | Vale do Rio Doce         |
| 372 | 8/22/2017 | neg | na   | <i>Callithrix</i> | non-epi | urban           | good         | Nova Lima            | -19,98 | -43,84 | Metropolitana            |
| 373 | 8/24/2017 | neg | na   | <i>Callithrix</i> | non-epi | urban           | intermediate | Arceburgo            | -21,36 | -46,94 | Sul/Sudoeste de Minas    |
| 404 | 8/30/2017 | pos | 35.7 | <i>Callicebus</i> | non-epi | rural           | good         | Pedralva             | -22,24 | -45,46 | Sul/Sudoeste de Minas    |
| 365 | 8/30/2017 | pos | 36.6 | <i>Callithrix</i> | non-epi | urban           | bad          | Pirajuba             | -19,9  | -48,7  | Triangulo/Alto Paranaiba |

|     |            |     |      |                   |         |             |              |                          |        |        |                          |
|-----|------------|-----|------|-------------------|---------|-------------|--------------|--------------------------|--------|--------|--------------------------|
| 364 | 8/30/2017  | neg | na   | <i>Callithrix</i> | non-epi | rural       | bad          | Fronteira                | -20,26 | -49,19 | Triangulo/Alto Paranaiba |
| 374 | 9/4/2017   | neg | na   | <i>Callithrix</i> | non-epi | urban       | good         | Sao Roque de Minas       | -20,24 | -46,36 | Oeste de Minas           |
| 371 | 9/4/2017   | neg | na   | <i>Callithrix</i> | non-epi | urban       | intermediate | Belo Horizonte           | -19,81 | -43,95 | Metropolitana            |
| 434 | 9/5/2017   | pos | 12.3 | <i>Alouatta</i>   | non-epi | rural       | good         | Lagoa Dourada            | -20,91 | -44,07 | Campo das Vertentes      |
| 370 | 9/12/2017  | neg | na   | <i>Callithrix</i> | non-epi | urban       | bad          | Belo Horizonte           | -19,81 | -43,95 | Metropolitana            |
| 383 | 9/13/2017  | neg | na   | <i>Callithrix</i> | non-epi | urban       | good         | Conceicao da Aparecida   | -21,09 | -46,2  | Sul/Sudoeste de Minas    |
| 379 | 9/14/2017  | neg | na   | <i>Callithrix</i> | non-epi | urban       | good         | Belo Horizonte           | -19,81 | -43,95 | Metropolitana            |
| 375 | 9/19/2017  | neg | na   | <i>Callithrix</i> | non-epi | rural       | good         | Fortuna de Minas         | -19,56 | -44,44 | Metropolitana            |
| 388 | 9/20/2017  | neg | na   | <i>Callicebus</i> | non-epi | rural       | good         | Caldas                   | -21,92 | -46,38 | Sul/Sudoeste de Minas    |
| 386 | 9/20/2017  | neg | na   | <i>Callithrix</i> | non-epi | urban       | intermediate | Sete Lagoas              | -19,46 | -44,24 | Metropolitana            |
| 368 | 9/25/2017  | neg | na   | <i>Callithrix</i> | non-epi | urban       | intermediate | Belo Horizonte           | -19,81 | -43,95 | Metropolitana            |
| 367 | 9/25/2017  | neg | na   | <i>Callithrix</i> | non-epi | urban       | intermediate | Alem Paraiba             | -21,88 | -42,7  | Zona da Mata             |
| 381 | 9/26/2017  | neg | na   | <i>Callithrix</i> | non-epi | urban       | good         | Governador Valadares     | -18,85 | -41,94 | Vale do Rio Doce         |
| 377 | 10/2/2017  | neg | na   | <i>Callithrix</i> | non-epi | rural       | good         | Canaa                    | -20,68 | -42,62 | Zona da Mata             |
| 376 | 10/10/2017 | neg | na   | <i>Callicebus</i> | non-epi | urban-rural | good         | Extrema                  | -22,85 | -46,31 | Sul/Sudoeste de Minas    |
| 369 | 10/11/2017 | neg | na   | <i>Callithrix</i> | non-epi | urban       | bad          | Sabara                   | -19,88 | -43,8  | Metropolitana            |
| 378 | 10/16/2017 | neg | na   | <i>Callithrix</i> | non-epi | urban       | good         | Belo Horizonte           | -19,81 | -43,95 | Metropolitana            |
| 382 | 10/16/2017 | neg | na   | <i>Callithrix</i> | non-epi | urban       | good         | Belo Horizonte           | -19,81 | -43,95 | Metropolitana            |
| 380 | 10/16/2017 | neg | na   | <i>Callithrix</i> | non-epi | urban-rural | good         | Nova Lima                | -19,98 | -43,84 | Metropolitana            |
| 385 | 10/16/2017 | neg | na   | <i>Callicebus</i> | non-epi | urban       | intermediate | Ouro Preto               | -20,28 | -43,5  | Metropolitana            |
| 395 | 10/17/2017 | pos | 36.6 | <i>Callicebus</i> | non-epi | rural       | intermediate | Itapagipe                | -19,9  | -49,38 | Triangulo/Alto Paranaiba |
| 392 | 10/17/2017 | neg | na   | <i>Callithrix</i> | non-epi | urban       | bad          | Itapagipe                | -19,9  | -49,38 | Triangulo/Alto Paranaiba |
| 485 | 10/20/2017 | pos | 34   | <i>Callithrix</i> | non-epi | urban       | good         | Sao Sebastiao do Paraiso | -20,91 | -46,99 | Sul/Sudoeste de Minas    |
| 408 | 10/26/2017 | neg | na   | <i>Callithrix</i> | non-epi | urban       | intermediate | Igarape                  | -20,07 | -44,3  | Metropolitana            |

|     |            |     |      |                   |         |             |              |                            |        |        |                       |
|-----|------------|-----|------|-------------------|---------|-------------|--------------|----------------------------|--------|--------|-----------------------|
| 482 | 10/27/2017 | neg | na   | <i>Callithrix</i> | non-epi | rural       | good         | Varzea da Palma            | -17,59 | -44,73 | Norte de Minas        |
| 430 | 10/30/2017 | pos | 14.5 | <i>Alouatta</i>   | non-epi | rural       | good         | Santana do Deserto         | -21,95 | -43,16 | Zona da Mata          |
| 406 | 10/30/2017 | pos | 9.2  | <i>Callithrix</i> | non-epi | urban-rural | good         | Sabara                     | -19,88 | -43,8  | Metropolitana         |
| 407 | 10/30/2017 | neg | na   | <i>Callithrix</i> | non-epi | urban       | good         | Esmeraldas                 | -19,76 | -44,31 | Metropolitana         |
| 432 | 11/7/2017  | pos | 31.8 | <i>Callicebus</i> | non-epi | rural       | good         | Sao Joao Batista do Gloria | -20,64 | -46,5  | Sul/Sudoeste de Minas |
| 431 | 11/7/2017  | pos | 36.5 | <i>Alouatta</i>   | non-epi | rural       | good         | Sao Francisco              | -15,94 | -44,86 | Oeste de Minas        |
| 614 | 11/7/2017  | neg | na   | <i>Callithrix</i> | non-epi | urban       | good         | Itamogi                    | -21,07 | -47,04 | Sul/Sudoeste de Minas |
| 409 | 11/7/2017  | neg | na   | <i>Callithrix</i> | non-epi | urban       | intermediate | Curvelo                    | -18,75 | -44,43 | Central Mineira       |
| 414 | 12/4/2017  | pos | 20.7 | <i>Alouatta</i>   | epi     | rural       | good         | Madre de Deus de Minas     | -21,48 | -44,33 | Campo das Vertentes   |
| 411 | 12/4/2017  | neg | na   | <i>Callithrix</i> | epi     | urban       | good         | Sete Lagoas                | -19,46 | -44,24 | Metropolitana         |
| 428 | 12/5/2017  | neg | na   | <i>Callithrix</i> | epi     | urban-rural | intermediate | Sao Francisco              | -15,94 | -44,86 | Norte de Minas        |
| 418 | 12/6/2017  | pos | 30.6 | <i>Callithrix</i> | epi     | urban       | intermediate | Itajuba                    | -22,42 | -45,45 | Sul/Sudoeste de Minas |
| 427 | 12/6/2017  | pos | 31.9 | <i>Callithrix</i> | epi     | urban       | intermediate | Sabara                     | -19,88 | -43,8  | Metropolitana         |
| 417 | 12/6/2017  | pos | 35.2 | <i>Callithrix</i> | epi     | urban       | good         | Sabara                     | -19,88 | -43,8  | Metropolitana         |
| 425 | 12/6/2017  | pos | 35.3 | <i>Callithrix</i> | epi     | urban       | intermediate | Sabara                     | -19,88 | -43,8  | Metropolitana         |
| 426 | 12/6/2017  | pos | 35.7 | <i>Alouatta</i>   | epi     | rural       | good         | Bom Jesus do Galho         | -19,82 | -42,31 | Vale do Rio Doce      |
| 422 | 12/6/2017  | pos | 35.8 | <i>Callithrix</i> | epi     | rural       | good         | Pirangucu                  | -22,52 | -45,49 | Sul/Sudoeste de Minas |
| 415 | 12/6/2017  | neg | na   | <i>Callithrix</i> | epi     | rural       | good         | Mariana                    | -20,37 | -43,41 | Metropolitana         |
| 419 | 12/6/2017  | neg | na   | <i>Callithrix</i> | epi     | urban       | good         | Sabara                     | -19,88 | -43,8  | Metropolitana         |
| 429 | 12/7/2017  | pos | 34   | <i>Callithrix</i> | epi     | urban       | good         | Bela Vista de Minas        | -19,83 | -43,09 | Metropolitana         |
| 423 | 12/7/2017  | pos | 37   | <i>Callithrix</i> | epi     | rural       | intermediate | Juiz de Fora               | -21,76 | -43,35 | Zona da Mata          |
| 421 | 12/7/2017  | pos | 15.3 | <i>Alouatta</i>   | epi     | rural       | good         | Matias Barbosa             | -21,86 | -43,31 | Zona da Mata          |
| 424 | 12/7/2017  | pos | 15.6 | <i>Alouatta</i>   | epi     | urban-rural | good         | Simao Pereira              | -21,96 | -43,31 | Zona da Mata          |
| 416 | 12/11/2017 | pos | 33.5 | <i>Callithrix</i> | epi     | urban       | intermediate | Belo Horizonte             | -19,81 | -43,95 | Metropolitana         |



|     |            |     |      |                   |     |             |              |                              |        |        |                          |
|-----|------------|-----|------|-------------------|-----|-------------|--------------|------------------------------|--------|--------|--------------------------|
| 493 | 12/11/2017 | neg | na   | <i>Callithrix</i> | epi | urban       | intermediate | Belo Horizonte               | -19,81 | -43,95 | Metropolitana            |
| 420 | 12/12/2017 | pos | 33   | <i>Callithrix</i> | epi | urban       | good         | Belo Horizonte               | -19,81 | -43,95 | Metropolitana            |
| 412 | 12/12/2017 | neg | na   | <i>Callithrix</i> | epi | urban       | good         | Belo Horizonte               | -19,81 | -43,95 | Metropolitana            |
| 616 | 12/12/2017 | neg | na   | <i>Callithrix</i> | epi | urban       | good         | Belo Horizonte               | -19,81 | -43,95 | Metropolitana            |
| 413 | 12/12/2017 | neg | na   | <i>Callithrix</i> | epi | urban       | intermediate | Juiz de Fora                 | -21,76 | -43,35 | Zona da Mata             |
| 440 | 12/13/2017 | pos | 15.2 | <i>Alouatta</i>   | epi | urban-rural | intermediate | Santo Antonio do Aventureiro | -21,75 | -42,81 | Zona da Mata             |
| 447 | 12/13/2017 | pos | 33.3 | <i>Callithrix</i> | epi | urban       | good         | Contagem                     | -19,93 | -44,05 | Metropolitana            |
| 410 | 12/13/2017 | neg | na   | <i>Callithrix</i> | epi | urban       | good         | Iguatama                     | -20,17 | -45,71 | Oeste de Minas           |
| 442 | 12/18/2017 | pos | 28.7 | <i>Callithrix</i> | epi | urban       | good         | Belo Horizonte               | -19,81 | -43,95 | Metropolitana            |
| 448 | 12/19/2017 | pos | 11.7 | <i>Alouatta</i>   | epi | urban-rural | good         | Juiz de Fora                 | -21,76 | -43,35 | Zona da Mata             |
| 435 | 12/19/2017 | neg | na   | <i>Callithrix</i> | epi | urban       | good         | Uberaba                      | -19,74 | -47,93 | Triangulo/Alto Paranaiba |
| 449 | 12/20/2017 | pos | 27.6 | <i>Callithrix</i> | epi | rural       | good         | Varzea da Palma              | -17,59 | -44,73 | Norte de Minas           |
| 437 | 12/20/2017 | neg | na   | <i>Callithrix</i> | epi | urban       | bad          | Morada Nova de Minas         | -18,6  | -45,35 | Central Mineira          |
| 441 | 12/21/2017 | pos | 30.3 | <i>Callithrix</i> | epi | urban       | good         | Vespasiano                   | -19,69 | -43,92 | Metropolitana            |
| 443 | 12/26/2017 | pos | 16   | <i>Alouatta</i>   | epi | rural       | good         | Piau                         | -21,5  | -43,32 | Zona da Mata             |
| 439 | 12/27/2017 | pos | 11   | na                | epi | rural       | good         | Caete                        | -19,88 | -43,67 | Metropolitana            |
| 445 | 12/28/2017 | pos | 11   | <i>Callithrix</i> | epi | urban       | good         | Belmiro Braga                | -21,94 | -43,41 | Zona da Mata             |
| 436 | 12/28/2017 | pos | 35   | <i>Callithrix</i> | epi | urban       | good         | Contagem                     | -19,93 | -44,05 | Metropolitana            |
| 446 | 12/28/2017 | pos | 28.5 | <i>Callithrix</i> | epi | urban       | good         | Sabara                       | -19,88 | -43,8  | Metropolitana            |
| 444 | 12/29/2017 | pos | 29   | <i>Callithrix</i> | epi | urban       | intermediate | Vespasiano                   | -19,69 | -43,92 | Metropolitana            |
| 438 | 12/29/2017 | neg | na   | <i>Callithrix</i> | epi | na          | bad          | Belo Horizonte               | -19,81 | -43,95 | Metropolitana            |
| 471 | 1/3/2018   | pos | 33   | <i>Alouatta</i>   | epi | rural       | good         | Dom Bosco                    | -16,65 | -46,27 | Noroeste de Minas        |
| 460 | 1/3/2018   | pos | 10.4 | <i>Callithrix</i> | epi | urban       | good         | Nova Lima                    | -19,98 | -43,84 | Metropolitana            |
| 452 | 1/3/2018   | pos | 10.5 | <i>Callithrix</i> | epi | rural       | good         | Rio Manso                    | -20,26 | -44,3  | Metropolitana            |

|         |           |     |      |                   |     |             |              |                    |        |        |                          |
|---------|-----------|-----|------|-------------------|-----|-------------|--------------|--------------------|--------|--------|--------------------------|
| 450     | 1/3/2018  | pos | 8.8  | na                | epi | rural       | good         | Nova Lima          | -19,98 | -43,84 | Metropolitana            |
| 451     | 1/3/2018  | neg | na   | <i>Callithrix</i> | epi | urban       | intermediate | Romaria            | -18,88 | -47,58 | Triangulo/Alto Paranaíba |
| 474     | 1/4/2018  | pos | 26.7 | <i>Callithrix</i> | epi | urban       | good         | Belo Horizonte     | -19,81 | -43,95 | Metropolitana            |
| 467     | 1/5/2018  | pos | 10   | <i>Callithrix</i> | epi | rural       | intermediate | Brumadinho         | -20,14 | -44,2  | Metropolitana            |
| 463     | 1/5/2018  | pos | 11   | <i>Alouatta</i>   | epi | urban       | good         | Juiz de Fora       | -21,76 | -43,35 | Zona da Mata             |
| 478     | 1/5/2018  | pos | 19.8 | <i>Callithrix</i> | epi | urban       | good         | Santa Luzia        | -19,77 | -43,85 | Metropolitana            |
| 461     | 1/5/2018  | pos | 33.2 | na                | epi | rural       | good         | Rio Novo           | -21,45 | -43,12 | Zona da Mata             |
| 455     | 1/5/2018  | pos | 7.7  | na                | epi | rural       | good         | Itabirito          | -20,25 | -43,8  | Metropolitana            |
| 472     | 1/5/2018  | pos | 9.3  | <i>Callithrix</i> | epi | rural       | good         | Brumadinho         | -20,14 | -44,2  | Metropolitana            |
| 479     | 1/5/2018  | neg | na   | <i>Callithrix</i> | epi | urban       | good         | Contagem           | -19,93 | -44,05 | Metropolitana            |
| 453     | 1/8/2018  | pos | 10.5 | <i>Alouatta</i>   | epi | rural       | good         | Santa Barbara      | -19,95 | -43,41 | Metropolitana            |
| 465     | 1/9/2018  | pos | 11   | <i>Callithrix</i> | epi | rural       | good         | Piranga            | -20,68 | -43,3  | Zona da Mata             |
| 475     | 1/9/2018  | pos | 11.1 | na                | epi | rural       | good         | Itatiaiuçu         | -20,19 | -44,42 | Metropolitana            |
| 468     | 1/9/2018  | pos | 34.1 | <i>Callithrix</i> | epi | urban       | intermediate | Carmo do Rio Claro | -20,97 | -46,11 | Sul/Sudoeste de Minas    |
| 481     | 1/10/2018 | pos | 14   | <i>Callithrix</i> | epi | rural       | intermediate | Brumadinho         | -20,14 | -44,2  | Metropolitana            |
| 480     | 1/10/2018 | pos | 31   | <i>Callithrix</i> | epi | urban-rural | good         | Caete              | -19,88 | -43,67 | Metropolitana            |
| 458     | 1/10/2018 | pos | 10.6 | <i>Alouatta</i>   | epi | rural       | good         | Lima Duarte        | -21,84 | -43,79 | Zona da Mata             |
| 477     | 1/10/2018 | pos | 27.8 | <i>Callithrix</i> | epi | urban       | good         | Betim              | -19,96 | -44,19 | Metropolitana            |
| 454     | 1/11/2018 | pos | 30.3 | <i>Callithrix</i> | epi | urban       | good         | Mateus Leme        | -19,98 | -44,42 | Metropolitana            |
| 462     | 1/11/2018 | pos | 31.5 | <i>Callithrix</i> | epi | urban       | good         | Esmeraldas         | -19,76 | -44,31 | Metropolitana            |
| 456     | 1/15/2018 | pos | 14   | <i>Callithrix</i> | epi | rural       | good         | Itaguara           | -20,39 | -44,48 | Metropolitana            |
| 473/492 | 1/15/2018 | pos | 11.2 | <i>Callithrix</i> | epi | rural       | good         | Sabara             | -19,88 | -43,8  | Metropolitana            |
| 457/615 | 1/15/2018 | pos | 23.6 | <i>Callithrix</i> | epi | urban       | good         | Belo Horizonte     | -19,81 | -43,95 | Metropolitana            |
| 470/491 | 1/15/2018 | pos | 28.6 | <i>Callithrix</i> | epi | urban       | good         | Vespasiano         | -19,69 | -43,92 | Metropolitana            |

|         |           |     |      |                   |     |       |              |                      |        |        |                       |
|---------|-----------|-----|------|-------------------|-----|-------|--------------|----------------------|--------|--------|-----------------------|
| 469/490 | 1/15/2018 | pos | 31.6 | <i>Callithrix</i> | epi | urban | intermediate | Belo Horizonte       | -19,81 | -43,95 | Metropolitana         |
| 466     | 1/15/2018 | pos | 32.6 | <i>Callithrix</i> | epi | urban | good         | Uba                  | -21,12 | -42,94 | Zona da Mata          |
| 476     | 1/15/2018 | pos | 9.5  | <i>Callithrix</i> | epi | rural | good         | Santa Barbara        | -19,95 | -43,41 | Metropolitana         |
| 464     | 1/15/2018 | pos | 9.5  | na                | epi | rural | intermediate | Belo Vale            | -20,4  | -44,02 | Metropolitana         |
| 500     | 1/16/2018 | pos | 33   | <i>Callithrix</i> | epi | rural | intermediate | Esmeraldas           | -19,76 | -44,31 | Metropolitana         |
| 497     | 1/16/2018 | pos | 34   | <i>Callithrix</i> | epi | urban | good         | Paracatu             | -17,22 | -46,87 | Noroeste de Minas     |
| 508     | 1/16/2018 | pos | 10.3 | <i>Callithrix</i> | epi | rural | good         | Porto Firme          | -20,67 | -43,08 | Zona da Mata          |
| 525     | 1/16/2018 | pos | 14.2 | <i>Callithrix</i> | epi | rural | good         | Bonfim               | -20,32 | -44,23 | Metropolitana         |
| 502     | 1/16/2018 | pos | 32.2 | <i>Callithrix</i> | epi | urban | good         | Paracatu             | -17,22 | -46,87 | Noroeste de Minas     |
| 538     | 1/16/2018 | pos | 33.9 | <i>Callithrix</i> | epi | rural | intermediate | Chiador              | -22    | -43,05 | Zona da Mata          |
| 524     | 1/16/2018 | neg | na   | <i>Callithrix</i> | epi | rural | good         | Cataguases           | -21,38 | -42,69 | Zona da Mata          |
| 495     | 1/17/2018 | pos | 10.2 | na                | epi | rural | good         | Piranga              | -20,68 | -43,3  | Zona da Mata          |
| 510     | 1/17/2018 | pos | 10.6 | <i>Callithrix</i> | epi | rural | good         | Brumadinho           | -20,14 | -44,2  | Metropolitana         |
| 531     | 1/17/2018 | pos | 31.8 | <i>Callithrix</i> | epi | urban | bad          | Matozinhos           | -19,55 | -44,08 | Metropolitana         |
| 537     | 1/17/2018 | pos | 35.5 | <i>Callithrix</i> | epi | rural | good         | Campos Gerais        | -21,23 | -45,75 | Sul/Sudoeste de Minas |
| 536     | 1/17/2018 | pos | 9.5  | na                | epi | rural | good         | Presidente Bernardes | -20,76 | -43,18 | Zona da Mata          |
| 530     | 1/17/2018 | neg | na   | <i>Callithrix</i> | epi | urban | intermediate | Belo Horizonte       | -19,81 | -43,95 | Metropolitana         |
| 515     | 1/18/2018 | pos | 10.8 | na                | epi | rural | intermediate | Itabirito            | -20,25 | -43,8  | Metropolitana         |
| 516     | 1/18/2018 | pos | 11.5 | <i>Callithrix</i> | epi | rural | intermediate | Bonfim               | -20,32 | -44,23 | Metropolitana         |
| 503     | 1/18/2018 | pos | 28.4 | <i>Callithrix</i> | epi | urban | good         | Barao de Cocais      | -19,94 | -43,48 | Metropolitana         |
| 505     | 1/18/2018 | pos | 36.5 | <i>Callithrix</i> | epi | urban | intermediate | Goiana               | -21,53 | -43,2  | Zona da Mata          |
| 534     | 1/18/2018 | pos | 9.7  | <i>Callithrix</i> | epi | urban | good         | Barao de Cocais      | -19,94 | -43,48 | Metropolitana         |
| 533     | 1/18/2018 | neg | na   | <i>Callithrix</i> | epi | urban | good         | Curvelo              | -18,75 | -44,43 | Central Mineira       |
| 527     | 1/18/2018 | neg | na   | <i>Callithrix</i> | epi | rural | intermediate | Andrelandia          | -21,74 | -44,3  | Sul/Sudoeste de Minas |
| 514     | 1/18/2018 | neg | na   | <i>Callithrix</i> | epi | urban | intermediate | Buenopolis           | -17,87 | -44,18 | Central Mineira       |

|     |           |     |      |                   |     |       |              |                       |        |        |                          |
|-----|-----------|-----|------|-------------------|-----|-------|--------------|-----------------------|--------|--------|--------------------------|
| 529 | 1/18/2018 | neg | na   | <i>Callithrix</i> | epi | urban | intermediate | Santos Dumont         | -21,45 | -43,55 | Zona da Mata             |
| 496 | 1/19/2018 | pos | 36   | <i>Callithrix</i> | epi | urban | good         | Belo Horizonte        | -19,81 | -43,95 | Metropolitana            |
| 522 | 1/19/2018 | pos | 14.1 | <i>Alouatta</i>   | epi | rural | good         | Alvinopolis           | -20,1  | -43,04 | Metropolitana            |
| 498 | 1/19/2018 | pos | 34.2 | <i>Callithrix</i> | epi | urban | intermediate | Santa Barbara         | -19,95 | -43,41 | Metropolitana            |
| 501 | 1/19/2018 | pos | 35.5 | <i>Callithrix</i> | epi | urban | good         | Belo Horizonte        | -19,81 | -43,95 | Metropolitana            |
| 507 | 1/19/2018 | neg | na   | <i>Callithrix</i> | epi | urban | bad          | Belo Horizonte        | -19,81 | -43,95 | Metropolitana            |
| 519 | 1/22/2018 | pos | 30   | <i>Callithrix</i> | epi | rural | intermediate | Santana de Cataguases | -21,28 | -42,55 | Zona da Mata             |
| 521 | 1/22/2018 | pos | 14.7 | <i>Callithrix</i> | epi | rural | good         | Moeda                 | -20,33 | -44,05 | Metropolitana            |
| 532 | 1/22/2018 | pos | 31.4 | na                | epi | rural | good         | Rio Piracicaba        | -19,92 | -43,17 | Metropolitana            |
| 528 | 1/22/2018 | pos | 8.9  | <i>Callithrix</i> | epi | rural | intermediate | Porto Firme           | -20,67 | -43,08 | Zona da Mata             |
| 511 | 1/22/2018 | neg | na   | <i>Callithrix</i> | epi | urban | good         | Belo Horizonte        | -19,81 | -43,95 | Metropolitana            |
| 582 | 1/23/2018 | pos | 8    | na                | epi | rural | intermediate | Ouro Preto            | -20,28 | -43,5  | Metropolitana            |
| 509 | 1/23/2018 | pos | 9    | <i>Callithrix</i> | epi | rural | intermediate | Brumadinho            | -20,14 | -44,2  | Metropolitana            |
| 526 | 1/23/2018 | pos | 13   | <i>Callithrix</i> | epi | urban | good         | Lagoa Santa           | -19,62 | -43,89 | Metropolitana            |
| 518 | 1/23/2018 | pos | 33   | <i>Alouatta</i>   | epi | rural | good         | Uniao de Minas        | -19,53 | -50,33 | Triangulo/Alto Paranaíba |
| 535 | 1/23/2018 | pos | 11.8 | <i>Callithrix</i> | epi | rural | bad          | Brumadinho            | -20,14 | -44,2  | Metropolitana            |
| 504 | 1/23/2018 | pos | 14.4 | <i>Callithrix</i> | epi | rural | good         | Nova Uniao            | -19,69 | -43,58 | Metropolitana            |
| 517 | 1/23/2018 | pos | 18.7 | <i>Callithrix</i> | epi | rural | good         | Guaraciaba            | -20,57 | -43    | Zona da Mata             |
| 583 | 1/23/2018 | pos | 30.1 | <i>Callithrix</i> | epi | na    | good         | Confins               | -19,63 | -43,98 | Metropolitana            |
| 588 | 1/23/2018 | pos | 35.4 | <i>Callithrix</i> | epi | urban | intermediate | Sabara                | -19,88 | -43,8  | Metropolitana            |
| 506 | 1/23/2018 | neg | na   | <i>Callithrix</i> | epi | na    | intermediate | Itauna                | -20,07 | -44,57 | Oeste de Minas           |
| 512 | 1/23/2018 | neg | na   | <i>Callithrix</i> | epi | rural | intermediate | Periquito             | -19,15 | -42,23 | Vale do Rio Doce         |
| 586 | 1/24/2018 | pos | 11   | <i>Alouatta</i>   | epi | rural | good         | Camanducaia           | -22,75 | -46,14 | Sul/Sudoeste de Minas    |
| 592 | 1/24/2018 | pos | 11   | na                | epi | rural | good         | Senhora de Oliveira   | -20,79 | -43,34 | Zona da Mata             |
| 593 | 1/24/2018 | pos | 10.5 | <i>Callithrix</i> | epi | rural | good         | Nova Uniao            | -19,69 | -43,58 | Metropolitana            |

|     |           |     |      |                   |     |             |              |                       |        |        |                       |
|-----|-----------|-----|------|-------------------|-----|-------------|--------------|-----------------------|--------|--------|-----------------------|
| 591 | 1/24/2018 | pos | 24.7 | <i>Callithrix</i> | epi | urban       | good         | Belo Horizonte        | -19,81 | -43,95 | Metropolitana         |
| 605 | 1/25/2018 | pos | 8    | na                | epi | rural       | good         | Paula Candido         | -20,87 | -42,98 | Zona da Mata          |
| 604 | 1/25/2018 | pos | 9    | <i>Callithrix</i> | epi | rural       | good         | Senhora dos Remedios  | -21,02 | -43,58 | Campo das Vertentes   |
| 560 | 1/25/2018 | pos | 11   | na                | epi | rural       | good         | Resende Costa         | -20,92 | -44,23 | Campo das Vertentes   |
| 599 | 1/25/2018 | pos | 29   | <i>Callithrix</i> | epi | rural       | good         | Sao Domingos do Prata | -19,86 | -42,96 | Metropolitana         |
| 563 | 1/25/2018 | pos | 30   | <i>Callithrix</i> | epi | urban       | intermediate | Lima Duarte           | -21,84 | -43,79 | Zona da Mata          |
| 603 | 1/25/2018 | pos | 32   | <i>Callithrix</i> | epi | urban       | bad          | Guaxupe               | -21,3  | -46,71 | Sul/Sudoeste de Minas |
| 600 | 1/25/2018 | pos | 10.3 | <i>Callithrix</i> | epi | rural       | good         | Bom Jesus do Amparo   | -19,7  | -43,47 | Metropolitana         |
| 584 | 1/25/2018 | pos | 10.4 | <i>Callithrix</i> | epi | urban       | intermediate | Joao Monlevade        | -19,81 | -43,17 | Metropolitana         |
| 552 | 1/25/2018 | pos | 13.3 | <i>Callithrix</i> | epi | na          | intermediate | Itatiaiuçu            | -20,19 | -44,42 | Metropolitana         |
| 561 | 1/25/2018 | pos | 32.2 | <i>Callithrix</i> | epi | urban-rural | good         | Sete Lagoas           | -19,46 | -44,24 | Metropolitana         |
| 580 | 1/25/2018 | neg | na   | <i>Callithrix</i> | epi | urban       | intermediate | Divinopolis           | -20,13 | -44,88 | Oeste de Minas        |
| 581 | 1/26/2018 | pos | 15   | <i>Callithrix</i> | epi | urban       | intermediate | Sarzedo               | -20,03 | -44,14 | Metropolitana         |
| 601 | 1/26/2018 | pos | 10.8 | <i>Callithrix</i> | epi | rural       | good         | Rio Piracicaba        | -19,92 | -43,17 | Metropolitana         |
| 555 | 1/26/2018 | pos | 20.3 | <i>Callithrix</i> | epi | rural       | intermediate | Jeceaba               | -20,53 | -43,98 | Metropolitana         |
| 607 | 1/26/2018 | pos | 27.3 | <i>Callithrix</i> | epi | urban       | intermediate | Vespasiano            | -19,69 | -43,92 | Metropolitana         |
| 606 | 1/26/2018 | pos | 28.2 | <i>Callithrix</i> | epi | urban       | good         | Santa Luzia           | -19,77 | -43,85 | Metropolitana         |
| 558 | 1/26/2018 | pos | 36.4 | <i>Callithrix</i> | epi | urban       | bad          | Curvelo               | -18,75 | -44,43 | Central Mineira       |
| 554 | 1/26/2018 | pos | 9.2  | <i>Callithrix</i> | epi | rural       | intermediate | Rio Piracicaba        | -19,92 | -43,17 | Metropolitana         |
| 556 | 1/26/2018 | neg | na   | <i>Callithrix</i> | epi | urban-rural | good         | Santana do Paraiso    | -19,36 | -42,56 | Vale do Rio Doce      |
| 578 | 1/29/2018 | pos | 9    | na                | epi | rural       | intermediate | Ouro Preto            | -20,28 | -43,5  | Metropolitana         |
| 566 | 1/29/2018 | pos | 13   | <i>Callithrix</i> | epi | urban       | intermediate | Nova Lima             | -19,98 | -43,84 | Metropolitana         |
| 571 | 1/29/2018 | pos | 10.3 | <i>Callithrix</i> | epi | rural       | good         | Itabirito             | -20,25 | -43,8  | Metropolitana         |
| 548 | 1/29/2018 | pos | 13.6 | <i>Callithrix</i> | epi | rural       | good         | Itaguara              | -20,39 | -44,48 | Metropolitana         |

|     |           |     |      |                   |     |             |              |                      |        |        |                          |
|-----|-----------|-----|------|-------------------|-----|-------------|--------------|----------------------|--------|--------|--------------------------|
| 550 | 1/29/2018 | pos | 24.3 | <i>Callithrix</i> | epi | urban       | intermediate | Itabirito            | -20,25 | -43,8  | Metropolitana            |
| 572 | 1/29/2018 | pos | 32.5 | <i>Callithrix</i> | epi | urban       | good         | Belo Vale            | -20,4  | -44,02 | Metropolitana            |
| 562 | 1/29/2018 | pos | 36.5 | <i>Callithrix</i> | epi | urban       | good         | Belo Horizonte       | -19,81 | -43,95 | Metropolitana            |
| 579 | 1/29/2018 | neg | na   | <i>Callithrix</i> | epi | urban       | bad          | Bambui               | -20    | -45,97 | Oeste de Minas           |
| 574 | 1/29/2018 | neg | na   | <i>Callithrix</i> | epi | urban       | good         | Ponte Nova           | -20,41 | -42,9  | Campo das Vertentes      |
| 565 | 1/29/2018 | neg | na   | <i>Callithrix</i> | epi | urban       | good         | Santa Luzia          | -19,77 | -43,85 | Metropolitana            |
| 576 | 1/30/2018 | pos | 32   | <i>Callithrix</i> | epi | urban       | bad          | Santa Luzia          | -19,77 | -43,85 | Metropolitana            |
| 541 | 1/30/2018 | pos | 11.2 | <i>Callithrix</i> | epi | rural       | good         | Santa Barbara        | -19,95 | -43,41 | Metropolitana            |
| 564 | 1/30/2018 | pos | 11.3 | <i>Callithrix</i> | epi | rural       | intermediate | Olaria               | -21,86 | -43,93 | Zona da Mata             |
| 549 | 1/30/2018 | pos | 11.8 | <i>Callithrix</i> | epi | rural       | intermediate | Coronel Pacheco      | -21,58 | -43,26 | Zona da Mata             |
| 543 | 1/30/2018 | pos | 12.6 | na                | epi | rural       | good         | Itabirito            | -20,25 | -43,8  | Metropolitana            |
| 553 | 1/30/2018 | pos | 9.9  | na                | epi | rural       | good         | Presidente Bernardes | -20,76 | -43,18 | Zona da Mata             |
| 567 | 1/30/2018 | neg | na   | na                | epi | rural       | bad          | Campo Florido        | -19,76 | -48,57 | Triangulo/Alto Paranaíba |
| 570 | 1/30/2018 | neg | na   | <i>Callithrix</i> | epi | rural       | good         | Diamantina           | -18,24 | -43,6  | Jequitinhonha            |
| 569 | 1/30/2018 | neg | na   | <i>Callithrix</i> | epi | urban       | good         | Ipatinga             | -19,46 | -42,53 | Vale do Rio Doce         |
| 585 | 1/30/2018 | neg | na   | <i>Callithrix</i> | epi | urban       | good         | Jaboticatubas        | -19,51 | -43,74 | Metropolitana            |
| 568 | 1/30/2018 | neg | na   | <i>Callithrix</i> | epi | rural       | intermediate | Conquista            | -19,93 | -47,54 | Triangulo/Alto Paranaíba |
| 575 | 1/30/2018 | neg | na   | <i>Callithrix</i> | epi | urban       | intermediate | Uberaba              | -19,74 | -47,93 | Triangulo/Alto Paranaíba |
| 577 | 1/30/2018 | neg | na   | <i>Callithrix</i> | epi | urban-rural | na           | Esmeraldas           | -19,76 | -44,31 | Metropolitana            |
| 540 | 1/31/2018 | pos | 10   | na                | epi | rural       | good         | Itatiaiuçu           | -20,19 | -44,42 | Metropolitana            |
| 544 | 1/31/2018 | pos | 14   | <i>Callithrix</i> | epi | rural       | good         | Nova Lima            | -19,98 | -43,84 | Metropolitana            |
| 545 | 1/31/2018 | pos | 32   | <i>Callithrix</i> | epi | urban       | good         | Astolfo Dutra        | -21,31 | -42,86 | Zona da Mata             |
| 542 | 1/31/2018 | pos | 30.4 | <i>Callithrix</i> | epi | urban       | intermediate | Leopoldina           | -21,53 | -42,64 | Zona da Mata             |
| 546 | 1/31/2018 | pos | 33.5 | <i>Callithrix</i> | epi | urban       | bad          | Cataguases           | -21,38 | -42,69 | Zona da Mata             |

|     |           |     |      |                   |     |       |              |                        |        |        |                          |
|-----|-----------|-----|------|-------------------|-----|-------|--------------|------------------------|--------|--------|--------------------------|
| 587 | 1/31/2018 | pos | 9.5  | na                | epi | rural | intermediate | Congonhal              | -22,15 | -46,03 | Sul/Sudoeste de Minas    |
| 557 | 1/31/2018 | neg | na   | <i>Callithrix</i> | epi | rural | bad          | Leopoldina             | -21,53 | -42,64 | Zona da Mata             |
| 551 | 1/31/2018 | neg | na   | na                | epi | urban | good         | Pocos de Caldas        | -21,78 | -46,56 | Sul/Sudoeste de Minas    |
| 547 | 1/31/2018 | neg | na   | <i>Callithrix</i> | epi | urban | intermediate | Cataguases             | -21,38 | -42,69 | Zona da Mata             |
| 657 | 2/1/2018  | pos | 14   | <i>Callithrix</i> | epi | urban | good         | Itabirito              | -20,25 | -43,8  | Metropolitana            |
| 635 | 2/1/2018  | pos | 33   | <i>Callithrix</i> | epi | urban | intermediate | Lagoa Santa            | -19,62 | -43,89 | Metropolitana            |
| 656 | 2/1/2018  | pos | 15.1 | <i>Callithrix</i> | epi | urban | intermediate | Nova Lima              | -19,98 | -43,84 | Metropolitana            |
| 661 | 2/1/2018  | pos | 26.6 | <i>Callithrix</i> | epi | urban | intermediate | Rio Piracicaba         | -19,92 | -43,17 | Metropolitana            |
| 621 | 2/1/2018  | pos | 36.2 | <i>Callithrix</i> | epi | urban | intermediate | Contagem               | -19,93 | -44,05 | Metropolitana            |
| 636 | 2/2/2018  | pos | 11   | <i>Callithrix</i> | epi | rural | intermediate | Ouro Preto             | -20,28 | -43,5  | Metropolitana            |
| 639 | 2/2/2018  | pos | 24.5 | <i>Callithrix</i> | epi | urban | good         | Ipatinga               | -19,46 | -42,53 | Vale do Rio Doce         |
| 629 | 2/2/2018  | pos | 31.5 | <i>Callithrix</i> | epi | rural | intermediate | Porto Firme            | -20,67 | -43,08 | Zona da Mata             |
| 638 | 2/2/2018  | pos | 8.4  | <i>Callithrix</i> | epi | rural | good         | Alto Rio Doce          | -21,02 | -43,41 | Zona da Mata             |
| 637 | 2/5/2018  | pos | 8.9  | <i>Callithrix</i> | epi | urban | good         | Itabirito              | -20,25 | -43,8  | Metropolitana            |
| 650 | 2/5/2018  | pos | 9.2  | na                | epi | rural | good         | Nova Lima              | -19,98 | -43,84 | Metropolitana            |
| 660 | 2/6/2018  | pos | 11.2 | <i>Callithrix</i> | epi | rural | bad          | Alfredo Vasconcelos    | -21,14 | -43,77 | Campo das Vertentes      |
| 662 | 2/6/2018  | pos | 28.7 | <i>Callithrix</i> | epi | rural | bad          | Desterro de Entre Rios | -20,66 | -44,33 | Metropolitana            |
| 654 | 2/6/2018  | pos | 8.2  | na                | epi | rural | good         | Ouro Branco            | -20,52 | -43,69 | Metropolitana            |
| 655 | 2/7/2018  | pos | 9    | na                | epi | rural | good         | Sapucaí Mirim          | -22,74 | -45,74 | Sul/Sudoeste de Minas    |
| 641 | 2/7/2018  | pos | 32.7 | <i>Callithrix</i> | epi | rural | intermediate | Tocos do Moji          | -22,37 | -46,09 | Sul/Sudoeste de Minas    |
| 631 | 2/7/2018  | pos | 7.6  | na                | epi | urban | good         | Santana do Paraíso     | -19,36 | -42,56 | Vale do Rio Doce         |
| 632 | 2/7/2018  | neg | na   | na                | epi | rural | good         | Conceição das Pedras   | -22,16 | -45,45 | Sul/Sudoeste de Minas    |
| 619 | 2/7/2018  | neg | na   | <i>Callithrix</i> | epi | urban | good         | Monte Carmelo          | -18,72 | -47,49 | Triangulo/Alto Paranaíba |
| 630 | 2/7/2018  | neg | na   | <i>Callithrix</i> | epi | urban | good         | Papagaios              | -19,44 | -44,74 | Metropolitana            |
| 643 | 2/8/2018  | pos | 33   | <i>Callithrix</i> | epi | urban | intermediate | Sete Lagoas            | -19,46 | -44,24 | Metropolitana            |

|     |           |     |      |            |     |             |              |                           |        |        |                          |
|-----|-----------|-----|------|------------|-----|-------------|--------------|---------------------------|--------|--------|--------------------------|
| 633 | 2/8/2018  | pos | 10.4 | na         | epi | rural       | good         | Carmo do Cajuru           | -20,18 | -44,77 | Oeste de Minas           |
| 652 | 2/8/2018  | pos | 30.4 | Callithrix | epi | urban       | good         | Sete Lagoas               | -19,46 | -44,24 | Metropolitana            |
| 634 | 2/8/2018  | pos | 33.2 | Callithrix | epi | rural       | good         | Sete Lagoas               | -19,46 | -44,24 | Metropolitana            |
| 653 | 2/9/2018  | pos | 30.2 | Callithrix | epi | urban       | bad          | Contagem                  | -19,93 | -44,05 | Metropolitana            |
| 659 | 2/9/2018  | neg | na   | Callithrix | epi | rural       | good         | Pedrinopolis              | -19,22 | -47,46 | Triangulo/Alto Paranaiba |
| 647 | 2/15/2018 | pos | 33   | Callithrix | epi | urban       | good         | Senador Firmino           | -20,91 | -43,09 | Zona da Mata             |
| 622 | 2/15/2018 | pos | 36   | Callithrix | epi | urban       | intermediate | Nova Era                  | -19,75 | -43,03 | Metropolitana            |
| 620 | 2/15/2018 | neg | na   | Callithrix | epi | urban       | good         | Santana dos Montes        | -20,78 | -43,69 | Metropolitana            |
| 626 | 2/15/2018 | neg | na   | Callithrix | epi | rural       | intermediate | Presidente Juscelino      | -18,63 | -44,05 | Central Mineira          |
| 640 | 2/16/2018 | pos | 31   | Callithrix | epi | urban       | intermediate | Divinopolis               | -20,13 | -44,88 | Oeste de Minas           |
| 645 | 2/16/2018 | pos | 34   | Callithrix | epi | urban       | intermediate | Divinopolis               | -20,13 | -44,88 | Oeste de Minas           |
| 642 | 2/16/2018 | pos | 36   | Callithrix | epi | urban       | good         | Santa Luzia               | -19,77 | -43,85 | Metropolitana            |
| 651 | 2/16/2018 | pos | 30.2 | Callithrix | epi | urban       | good         | Belo Horizonte            | -19,81 | -43,95 | Metropolitana            |
| 649 | 2/16/2018 | pos | 34.6 | Callithrix | epi | urban       | good         | Visconde do Rio Branco    | -21,01 | -42,84 | Zona da Mata             |
| 624 | 2/16/2018 | pos | 36.7 | Callithrix | epi | urban       | intermediate | Muzambinho                | -21,37 | -46,52 | Sul/Sudoeste de Minas    |
| 628 | 2/16/2018 | neg | na   | Callithrix | epi | urban-rural | intermediate | Ribeirao das Neves        | -19,76 | -44,08 | Metropolitana            |
| 678 | 2/19/2018 | pos | 36   | Callithrix | epi | urban       | good         | Uberlandia                | -18,91 | -48,27 | Triangulo/Alto Paranaiba |
| 625 | 2/19/2018 | pos | 33.8 | Callithrix | epi | urban       | intermediate | Belo Horizonte            | -19,81 | -43,95 | Metropolitana            |
| 673 | 2/19/2018 | neg | na   | Callithrix | epi | urban       | good         | Uberlandia                | -18,91 | -48,27 | Triangulo/Alto Paranaiba |
| 694 | 2/21/2018 | pos | 11   | Callithrix | epi | rural       | good         | Ouro Preto                | -20,28 | -43,5  | Metropolitana            |
| 696 | 2/21/2018 | pos | 28   | Callithrix | epi | rural       | intermediate | Uberaba                   | -19,74 | -47,93 | Triangulo/Alto Paranaiba |
| 687 | 2/21/2018 | neg | na   | Callithrix | epi | rural       | good         | Silvianopolis             | -22,02 | -45,83 | Sul/Sudoeste de Minas    |
| 688 | 2/21/2018 | neg | na   | na         | epi | rural       | good         | Espirito Santo do Dourado | -22,04 | -45,95 | Sul/Sudoeste de Minas    |
| 665 | 2/21/2018 | neg | na   | Callithrix | epi | urban       | good         | Belo Horizonte            | -19,81 | -43,95 | Metropolitana            |



|     |           |     |      |                   |         |             |              |                          |        |        |                          |
|-----|-----------|-----|------|-------------------|---------|-------------|--------------|--------------------------|--------|--------|--------------------------|
| 681 | 2/21/2018 | neg | na   | <i>Callithrix</i> | epi     | urban       | good         | Uberlandia               | -18,91 | -48,27 | Triangulo/Alto Paranaíba |
| 677 | 2/21/2018 | neg | na   | <i>Callithrix</i> | epi     | rural       | intermediate | Lontra                   | -15,9  | -44,3  | Norte de Minas           |
| 703 | 2/21/2018 | neg | na   | <i>Callithrix</i> | epi     | urban       | intermediate | Araxa                    | -19,59 | -46,94 | Triangulo/Alto Paranaíba |
| 666 | 2/22/2018 | pos | 37   | <i>Callithrix</i> | epi     | urban       | bad          | Buenopolis               | -17,87 | -44,18 | Central Mineira          |
| 679 | 2/22/2018 | neg | na   | <i>Callithrix</i> | epi     | rural       | bad          | Divinesia                | -20,99 | -43    | Zona da Mata             |
| 699 | 2/22/2018 | neg | na   | <i>Callithrix</i> | epi     | rural       | bad          | Uba                      | -21,12 | -42,94 | Zona da Mata             |
| 664 | 2/22/2018 | neg | na   | <i>Callithrix</i> | epi     | urban       | good         | Tocantins                | -21,17 | -43,01 | Zona da Mata             |
| 692 | 2/26/2018 | neg | na   | <i>Alouatta</i>   | epi     | rural       | good         | Cabeceira Grande         | -16,03 | -47,09 | Noroeste de Minas        |
| 671 | 2/26/2018 | neg | na   | <i>Alouatta</i>   | epi     | rural       | good         | Leopoldina               | -21,53 | -42,64 | Zona da Mata             |
| 682 | 2/26/2018 | neg | na   | <i>Callithrix</i> | epi     | rural       | good         | Leopoldina               | -21,53 | -42,64 | Zona da Mata             |
| 684 | 2/26/2018 | neg | na   | <i>Callithrix</i> | epi     | urban       | good         | Belo Horizonte           | -19,81 | -43,95 | Metropolitana            |
| 669 | 2/27/2018 | neg | na   | <i>Callithrix</i> | epi     | rural       | good         | Sao Sebastiao do Paraiso | -20,91 | -46,99 | Sul/Sudoeste de Minas    |
| 685 | 2/27/2018 | neg | na   | na                | epi     | rural       | good         | Corrego Novo             | -19,83 | -42,39 | Vale do Rio Doce         |
| 672 | 2/27/2018 | neg | na   | <i>Callithrix</i> | epi     | urban       | good         | Antonio Dias             | -19,65 | -42,87 | Zona da Mata             |
| 700 | 2/28/2018 | pos | 34.4 | <i>Callithrix</i> | epi     | rural       | good         | Iturama                  | -19,72 | -50,19 | Triangulo/Alto Paranaíba |
| 683 | 2/28/2018 | neg | na   | na                | epi     | rural       | good         | Itapeva                  | -22,76 | -46,22 | Sul/Sudoeste de Minas    |
| 670 | 2/28/2018 | neg | na   | <i>Callithrix</i> | epi     | urban       | good         | Divinopolis              | -20,13 | -44,88 | Oeste de Minas           |
| 676 | 2/28/2018 | neg | na   | <i>Callithrix</i> | epi     | urban       | good         | Uberlandia               | -18,91 | -48,27 | Triangulo/Alto Paranaíba |
| 723 | 3/6/2018  | neg | na   | <i>Callithrix</i> | epi     | urban       | good         | Liberdade                | -22,02 | -44,32 | Sul/Sudoeste de Minas    |
| 727 | 3/6/2018  | neg | na   | <i>Callithrix</i> | epi     | urban-rural | good         | Divinopolis              | -20,13 | -44,88 | Oeste de Minas           |
| 704 | 3/7/2018  | pos | 36   | <i>Callithrix</i> | epi     | urban       | good         | Belo Horizonte           | -19,81 | -43,95 | Metropolitana            |
| 730 | 3/7/2018  | neg | na   | <i>Callithrix</i> | non-epi | na          | good         | Uberlandia               | -18,91 | -48,27 | Triangulo/Alto Paranaíba |
| 726 | 3/7/2018  | neg | na   | <i>Callithrix</i> | epi     | urban       | good         | Araguari                 | -18,64 | -48,18 | Triangulo/Alto Paranaíba |
| 724 | 3/7/2018  | neg | na   | <i>Callithrix</i> | epi     | urban       | good         | Coromandel               | -18,47 | -47,2  | Triangulo/Alto Paranaíba |

|     |           |     |      |                   |     |             |              |                          |        |        |                          |
|-----|-----------|-----|------|-------------------|-----|-------------|--------------|--------------------------|--------|--------|--------------------------|
| 728 | 3/7/2018  | neg | na   | <i>Callithrix</i> | epi | urban       | good         | Monte Carmelo            | -18,72 | -47,49 | Triangulo/Alto Paranaíba |
| 707 | 3/7/2018  | neg | na   | <i>Callithrix</i> | epi | urban       | good         | Uberlandia               | -18,91 | -48,27 | Triangulo/Alto Paranaíba |
| 725 | 3/7/2018  | neg | na   | <i>Callithrix</i> | epi | urban       | good         | Uberlandia               | -18,91 | -48,27 | Triangulo/Alto Paranaíba |
| 720 | 3/8/2018  | neg | na   | <i>Callithrix</i> | epi | urban       | bad          | Sete Lagoas              | -19,46 | -44,24 | Metropolitana            |
| 721 | 3/8/2018  | neg | na   | <i>Callithrix</i> | epi | urban       | intermediate | Sete Lagoas              | -19,46 | -44,24 | Metropolitana            |
| 717 | 3/9/2018  | neg | na   | <i>Callithrix</i> | epi | urban       | good         | Divinopolis              | -20,13 | -44,88 | Oeste de Minas           |
| 713 | 3/13/2018 | neg | na   | <i>Callithrix</i> | epi | urban       | good         | Sao Sebastiao do Paraiso | -20,91 | -46,99 | Sul/Sudoeste de Minas    |
| 711 | 3/14/2018 | pos | 35   | <i>Callithrix</i> | epi | urban       | good         | Estrela do Sul           | -18,74 | -47,69 | Triangulo/Alto Paranaíba |
| 715 | 3/14/2018 | pos | 36.6 | <i>Callithrix</i> | epi | rural       | good         | Patrocinio               | -18,94 | -46,99 | Triangulo/Alto Paranaíba |
| 708 | 3/15/2018 | pos | 11   | <i>Callithrix</i> | epi | rural       | good         | Andrelandia              | -21,74 | -44,3  | Triangulo/Alto Paranaíba |
| 706 | 3/15/2018 | pos | 34.5 | <i>Callithrix</i> | epi | urban       | good         | Belo Horizonte           | -19,81 | -43,95 | Metropolitana            |
| 710 | 3/16/2018 | pos | 36.8 | <i>Callithrix</i> | epi | urban       | good         | Belo Horizonte           | -19,81 | -43,95 | Metropolitana            |
| 714 | 3/16/2018 | neg | na   | <i>Callithrix</i> | epi | rural       | good         | Inhauma                  | -19,49 | -44,39 | Metropolitana            |
| 719 | 3/21/2018 | neg | na   | <i>Callithrix</i> | epi | urban       | intermediate | Arapora                  | -18,43 | -49,18 | Triangulo/Alto Paranaíba |
| 742 | 4/10/2018 | neg | na   | <i>Callithrix</i> | epi | rural       | good         | Belo Horizonte           | -19,81 | -43,95 | Metropolitana            |
| 735 | 4/10/2018 | neg | na   | <i>Callithrix</i> | epi | urban       | good         | Passos                   | -20,71 | -46,61 | Sul/Sudoeste de Minas    |
| 741 | 4/10/2018 | neg | na   | <i>Callithrix</i> | epi | urban-rural | good         | Igaratinga               | -19,95 | -44,7  | Oeste de Minas           |
| 747 | 4/11/2018 | pos | 12   | <i>Callithrix</i> | epi | urban-rural | good         | Tiradentes               | -21,11 | -44,17 | Campo das Vertentes      |
| 740 | 4/11/2018 | neg | na   | <i>Callithrix</i> | epi | rural       | good         | Felixlandia              | -18,75 | -44,89 | Central Mineira          |
| 734 | 4/11/2018 | neg | na   | <i>Callithrix</i> | epi | rural       | good         | Presidente Juscelino     | -18,63 | -44,05 | Central Mineira          |
| 745 | 4/11/2018 | neg | na   | <i>Callithrix</i> | epi | rural       | good         | Ribeirao das Neves       | -19,76 | -44,08 | Metropolitana            |
| 739 | 4/11/2018 | neg | na   | <i>Callithrix</i> | epi | urban       | good         | Aracuai                  | -16,85 | -42,07 | Jequitinhonha            |
| 750 | 4/11/2018 | neg | na   | <i>Callithrix</i> | epi | urban       | good         | Sao Romao                | -16,36 | -45,06 | Norte de Minas           |
| 732 | 4/11/2018 | neg | na   | <i>Callithrix</i> | epi | urban       | intermediate | Uberaba                  | -19,74 | -47,93 | Triangulo/Alto Paranaíba |

|     |           |     |    |                   |     |             |              |                        |        |        |                          |
|-----|-----------|-----|----|-------------------|-----|-------------|--------------|------------------------|--------|--------|--------------------------|
| 744 | 4/12/2018 | neg | na | <i>Callithrix</i> | epi | urban       | good         | Belo Horizonte         | -19,81 | -43,95 | Metropolitana            |
| 746 | 4/13/2018 | neg | na | <i>Callithrix</i> | epi | rural       | bad          | Monte Carmelo          | -18,72 | -47,49 | Triangulo/Alto Paranaíba |
| 749 | 4/16/2018 | neg | na | <i>Callithrix</i> | epi | urban       | good         | Belo Horizonte         | -19,81 | -43,95 | Metropolitana            |
| 736 | 4/17/2018 | neg | na | <i>Alouatta</i>   | epi | rural       | good         | Monte Carmelo          | -18,72 | -47,49 | Triangulo/Alto Paranaíba |
| 743 | 4/17/2018 | neg | na | <i>Callithrix</i> | epi | urban       | good         | Belo Horizonte         | -19,81 | -43,95 | Metropolitana            |
| 737 | 4/18/2018 | neg | na | <i>Callithrix</i> | epi | urban       | good         | Belo Horizonte         | -19,81 | -43,95 | Metropolitana            |
| 738 | 4/19/2018 | neg | na | <i>Callithrix</i> | epi | urban       | good         | Belo Horizonte         | -19,81 | -43,95 | Metropolitana            |
| 793 | 4/23/2018 | neg | na | <i>Callithrix</i> | epi | urban       | good         | Muzambinho             | -21,37 | -46,52 | Sul/Sudoeste de Minas    |
| 796 | 4/25/2018 | neg | na | <i>Callithrix</i> | epi | urban-rural | bad          | Itajuba                | -22,42 | -45,45 | Sul/Sudoeste de Minas    |
| 775 | 4/25/2018 | neg | na | <i>Callithrix</i> | epi | rural       | good         | Ibirité                | -20,02 | -44,05 | Metropolitana            |
| 790 | 4/26/2018 | neg | na | <i>Callithrix</i> | epi | urban       | intermediate | Visconde do Rio Branco | -21,01 | -42,84 | Zona da Mata             |
| 783 | 4/26/2018 | neg | na | <i>Callithrix</i> | epi | urban-rural | intermediate | Guanhaes               | -18,77 | -42,93 | Vale do Rio Doce         |
| 782 | 4/27/2018 | neg | na | <i>Callithrix</i> | epi | rural       | intermediate | Ipatinga               | -19,46 | -42,53 | Vale do Rio Doce         |
| 776 | 4/27/2018 | neg | na | <i>Callithrix</i> | epi | urban       | intermediate | Nova Resende           | -21,12 | -46,42 | Sul/Sudoeste de Minas    |
| 774 | 4/27/2018 | neg | na | <i>Callithrix</i> | epi | urban       | intermediate | Ribeirao das Neves     | -19,76 | -44,08 | Metropolitana            |
| 784 | 5/7/2018  | neg | na | <i>Callithrix</i> | epi | urban       | bad          | Leopoldina             | -21,53 | -42,64 | Zona da Mata             |
| 761 | 5/7/2018  | neg | na | <i>Callithrix</i> | epi | rural       | good         | Leopoldina             | -21,53 | -42,64 | Zona da Mata             |
| 767 | 5/7/2018  | neg | na | <i>Callithrix</i> | epi | urban       | good         | Belo Horizonte         | -19,81 | -43,95 | Metropolitana            |
| 777 | 5/7/2018  | neg | na | <i>Callithrix</i> | epi | urban       | good         | Belo Horizonte         | -19,81 | -43,95 | Metropolitana            |
| 780 | 5/7/2018  | neg | na | <i>Callithrix</i> | epi | urban       | good         | Belo Horizonte         | -19,81 | -43,95 | Metropolitana            |
| 794 | 5/7/2018  | neg | na | <i>Callithrix</i> | epi | urban       | good         | Pirapora               | -17,34 | -44,94 | Norte de Minas           |
| 789 | 5/7/2018  | neg | na | <i>Callithrix</i> | epi | urban-rural | intermediate | Augusto de Lima        | -18,1  | -44,26 | Central Mineira          |
| 751 | 5/8/2018  | neg | na | <i>Callithrix</i> | epi | rural       | good         | Uberaba                | -19,74 | -47,93 | Triangulo/Alto Paranaíba |

|     |           |     |    |                   |     |       |              |                      |        |        |                          |
|-----|-----------|-----|----|-------------------|-----|-------|--------------|----------------------|--------|--------|--------------------------|
| 760 | 5/8/2018  | neg | na | <i>Callithrix</i> | epi | rural | good         | Uberaba              | -19,74 | -47,93 | Triangulo/Alto Paranaíba |
| 773 | 5/8/2018  | neg | na | <i>Callithrix</i> | epi | rural | good         | Uberaba              | -19,74 | -47,93 | Triangulo/Alto Paranaíba |
| 762 | 5/8/2018  | neg | na | <i>Callithrix</i> | epi | urban | good         | Belo Horizonte       | -19,81 | -43,95 | Metropolitana            |
| 788 | 5/8/2018  | neg | na | <i>Callithrix</i> | epi | urban | good         | Contagem             | -19,93 | -44,05 | Metropolitana            |
| 787 | 5/8/2018  | neg | na | <i>Callithrix</i> | epi | urban | good         | Uberaba              | -19,74 | -47,93 | Triangulo/Alto Paranaíba |
| 792 | 5/8/2018  | neg | na | <i>Callithrix</i> | epi | rural | intermediate | Arinos               | -15,91 | -46,1  | Noroeste de Minas        |
| 755 | 5/8/2018  | neg | na | <i>Callithrix</i> | epi | rural | intermediate | Uberaba              | -19,74 | -47,93 | Triangulo/Alto Paranaíba |
| 766 | 5/8/2018  | neg | na | <i>Callithrix</i> | epi | rural | intermediate | Uberaba              | -19,74 | -47,93 | Triangulo/Alto Paranaíba |
| 781 | 5/8/2018  | neg | na | <i>Callithrix</i> | epi | urban | intermediate | Governador Valadares | -18,85 | -41,94 | Vale do Rio Doce         |
| 778 | 5/8/2018  | neg | na | <i>Callithrix</i> | epi | urban | intermediate | Paracatu             | -17,22 | -46,87 | Noroeste de Minas        |
| 759 | 5/9/2018  | neg | na | <i>Callithrix</i> | epi | urban | good         | Monte Santo de Minas | -21,19 | -46,98 | Sul/Sudoeste de Minas    |
| 771 | 5/9/2018  | neg | na | <i>Callithrix</i> | epi | urban | good         | Uberlandia           | -18,91 | -48,27 | Campo das Vertentes      |
| 779 | 5/9/2018  | neg | na | <i>Callithrix</i> | epi | urban | good         | Uberlandia           | -18,91 | -48,27 | Triangulo/Alto Paranaíba |
| 791 | 5/9/2018  | neg | na | <i>Callithrix</i> | epi | urban | intermediate | Sao Tiago            | -20,91 | -44,5  | Campo das Vertentes      |
| 752 | 5/14/2018 | neg | na | <i>Callithrix</i> | epi | urban | good         | Belo Horizonte       | -19,81 | -43,95 | Metropolitana            |
| 758 | 5/14/2018 | neg | na | <i>Callithrix</i> | epi | urban | good         | Belo Horizonte       | -19,81 | -43,95 | Metropolitana            |
| 786 | 5/14/2018 | neg | na | <i>Callithrix</i> | epi | urban | intermediate | Belo Horizonte       | -19,81 | -43,95 | Metropolitana            |
| 785 | 5/15/2018 | neg | na | <i>Callithrix</i> | epi | rural | good         | Timoteo              | -19,58 | -42,64 | Zona da Mata             |
| 769 | 5/15/2018 | neg | na | <i>Callithrix</i> | epi | urban | good         | Belo Horizonte       | -19,81 | -43,95 | Metropolitana            |
| 770 | 5/15/2018 | neg | na | <i>Callithrix</i> | epi | urban | good         | Tiradentes           | -21,11 | -44,17 | Campo das Vertentes      |
| 765 | 5/16/2018 | neg | na | <i>Callithrix</i> | epi | rural | good         | Prudente de Morais   | -19,48 | -44,15 | Metropolitana            |
| 764 | 5/16/2018 | neg | na | <i>Callithrix</i> | epi | urban | good         | Monte Santo de Minas | -21,19 | -46,98 | Sul/Sudoeste de Minas    |
| 754 | 5/17/2018 | neg | na | <i>Callithrix</i> | epi | urban | na           | Alem Paraiba         | -21,88 | -42,7  | Zona da Mata             |
| 795 | 5/17/2018 | neg | na | na                | epi | urban | na           | Buenopolis           | -17,87 | -44,18 | Central Mineira          |
| 763 | 5/17/2018 | neg | na | na                | epi | urban | na           | Cataguases           | -21,38 | -42,69 | Zona da Mata             |

|     |           |     |    |                   |         |       |              |                      |        |        |                          |
|-----|-----------|-----|----|-------------------|---------|-------|--------------|----------------------|--------|--------|--------------------------|
| 772 | 5/21/2018 | neg | na | <i>Callithrix</i> | epi     | urban | good         | Belo Horizonte       | -19,81 | -43,95 | Metropolitana            |
| 757 | 5/22/2018 | neg | na | <i>Callithrix</i> | epi     | rural | good         | Estrela do Sul       | -18,74 | -47,69 | Triangulo/Alto Paranaíba |
| 768 | 5/22/2018 | neg | na | <i>Callithrix</i> | epi     | urban | intermediate | Governador Valadares | -18,85 | -41,94 | Vale do Rio Doce         |
| 828 | 5/23/2018 | neg | na | <i>Callithrix</i> | epi     | urban | good         | Belo Horizonte       | -19,81 | -43,95 | Metropolitana            |
| 800 | 5/23/2018 | neg | na | <i>Callithrix</i> | epi     | urban | good         | Itajuba              | -22,42 | -45,45 | Sul/Sudoeste de Minas    |
| 833 | 5/24/2018 | neg | na | <i>Callithrix</i> | epi     | urban | good         | Gouveia              | -18,45 | -43,74 | Jequitinhonha            |
| 803 | 5/29/2018 | neg | na | <i>Callithrix</i> | epi     | urban | bad          | Uberlandia           | -18,91 | -48,27 | Triangulo/Alto Paranaíba |
| 812 | 5/29/2018 | neg | na | <i>Callithrix</i> | epi     | urban | good         | Uberlandia           | -18,91 | -48,27 | Triangulo/Alto Paranaíba |
| 826 | 5/29/2018 | neg | na | <i>Callithrix</i> | epi     | urban | good         | Uberlandia           | -18,91 | -48,27 | Triangulo/Alto Paranaíba |
| 801 | 5/29/2018 | neg | na | <i>Callithrix</i> | epi     | urban | intermediate | Abadia dos Dourados  | -18,48 | -47,4  | Triangulo/Alto Paranaíba |
| 804 | 5/30/2018 | neg | na | <i>Callithrix</i> | epi     | urban | bad          | Cataguases           | -21,38 | -42,69 | Zona da Mata             |
| 811 | 5/30/2018 | neg | na | <i>Callithrix</i> | epi     | rural | good         | Uruana de Minas      | -16,06 | -46,25 | Noroeste de Minas        |
| 816 | 5/30/2018 | neg | na | <i>Callithrix</i> | epi     | urban | good         | Belo Horizonte       | -19,81 | -43,95 | Metropolitana            |
| 819 | 5/30/2018 | neg | na | <i>Callithrix</i> | non-epi | rural | intermediate | Uruana de Minas      | -16,06 | -46,25 | Noroeste de Minas        |
| 827 | 6/5/2018  | neg | na | <i>Callithrix</i> | non-epi | urban | bad          | Mantena              | -18,78 | -40,98 | Vale do Rio Doce         |
| 807 | 6/5/2018  | neg | na | <i>Callithrix</i> | non-epi | rural | good         | Tiros                | -19    | -45,96 | Triangulo/Alto Paranaíba |
| 818 | 6/5/2018  | neg | na | <i>Callithrix</i> | non-epi | urban | good         | Guaxupe              | -21,3  | -46,71 | Sul/Sudoeste de Minas    |
| 815 | 6/5/2018  | neg | na | <i>Callithrix</i> | non-epi | urban | good         | Lagoa Formosa        | -18,77 | -46,4  | Triangulo/Alto Paranaíba |
| 832 | 6/5/2018  | neg | na | <i>Callithrix</i> | non-epi | urban | good         | Ribeirao das Neves   | -19,76 | -44,08 | Metropolitana            |
| 797 | 6/5/2018  | neg | na | <i>Callithrix</i> | non-epi | rural | intermediate | Carmo do Paranaíba   | -19    | -46,31 | Triangulo/Alto Paranaíba |
| 820 | 6/6/2018  | neg | na | <i>Callithrix</i> | non-epi | rural | good         | Arceburgo            | -21,36 | -46,94 | Sul/Sudoeste de Minas    |
| 831 | 6/6/2018  | neg | na | <i>Callithrix</i> | non-epi | rural | good         | Arceburgo            | -21,36 | -46,94 | Sul/Sudoeste de Minas    |
| 829 | 6/6/2018  | neg | na | <i>Callithrix</i> | non-epi | rural | good         | Catas Altas          | -20,07 | -43,4  | Metropolitana            |
| 825 | 6/6/2018  | neg | na | <i>Callithrix</i> | non-epi | rural | good         | Lassance             | -17,88 | -44,57 | Norte de Minas           |
| 814 | 6/6/2018  | neg | na | <i>Callithrix</i> | non-epi | rural | good         | Uberlandia           | -18,91 | -48,27 | Triangulo/Alto Paranaíba |

|     |           |     |    |                   |         |       |              |                          |        |        |                          |
|-----|-----------|-----|----|-------------------|---------|-------|--------------|--------------------------|--------|--------|--------------------------|
| 798 | 6/6/2018  | neg | na | na                | non-epi | rural | good         | Ibituruna                | -21,15 | -44,74 | Oeste de Minas           |
| 824 | 6/6/2018  | neg | na | <i>Callithrix</i> | non-epi | urban | good         | Uberlandia               | -18,91 | -48,27 | Triangulo/Alto Paranaiba |
| 817 | 6/7/2018  | neg | na | <i>Callithrix</i> | non-epi | urban | good         | Cataguases               | -21,38 | -42,69 | Zona da Mata             |
| 799 | 6/11/2018 | neg | na | <i>Callithrix</i> | non-epi | urban | good         | Belo Horizonte           | -19,81 | -43,95 | Metropolitana            |
| 809 | 6/12/2018 | neg | na | <i>Callithrix</i> | non-epi | urban | good         | Curvelo                  | -18,75 | -44,43 | Central Mineira          |
| 830 | 6/13/2018 | neg | na | <i>Callithrix</i> | non-epi | urban | good         | Buenopolis               | -17,87 | -44,18 | Central Mineira          |
| 822 | 6/13/2018 | neg | na | <i>Callithrix</i> | non-epi | urban | good         | Planura                  | -20,13 | -48,7  | Triangulo/Alto Paranaiba |
| 805 | 6/13/2018 | neg | na | <i>Callithrix</i> | non-epi | rural | intermediate | Frutal                   | -20,02 | -48,94 | Triangulo/Alto Paranaiba |
| 821 | 6/13/2018 | neg | na | <i>Callithrix</i> | non-epi | urban | intermediate | Araxa                    | -19,59 | -46,94 | Triangulo/Alto Paranaiba |
| 834 | 6/13/2018 | neg | na | <i>Callithrix</i> | non-epi | urban | intermediate | Araxa                    | -19,59 | -46,94 | Triangulo/Alto Paranaiba |
| 813 | 6/13/2018 | neg | na | <i>Callithrix</i> | non-epi | urban | intermediate | Sao Sebastiao do Paraiso | -20,91 | -46,99 | Sul/Sudoeste de Minas    |
| 835 | 6/15/2018 | neg | na | <i>Callithrix</i> | non-epi | rural | intermediate | Gouveia                  | -18,45 | -43,74 | Jequitinhonha            |
| 802 | 6/21/2018 | neg | na | <i>Callithrix</i> | non-epi | urban | good         | Belo Horizonte           | -19,81 | -43,95 | Metropolitana            |
| 810 | 6/21/2018 | neg | na | <i>Callithrix</i> | non-epi | urban | good         | Belo Horizonte           | -19,81 | -43,95 | Metropolitana            |
| 823 | 6/21/2018 | neg | na | <i>Callithrix</i> | non-epi | urban | good         | Curvelo                  | -18,75 | -44,43 | Central Mineira          |
| 808 | 6/21/2018 | neg | na | <i>Callithrix</i> | non-epi | urban | intermediate | Aimores                  | -19,49 | -41,06 | Vale do Rio Doce         |
| 838 | 6/25/2018 | neg | na | <i>Callithrix</i> | non-epi | urban | good         | Ibirite                  | -20,02 | -44,05 | Metropolitana            |
| 845 | 6/25/2018 | neg | na | na                | non-epi | urban | good         | Sericita                 | -20,47 | -42,48 | Zona da Mata             |
| 846 | 6/26/2018 | neg | na | <i>Callithrix</i> | non-epi | urban | good         | Governador Valadares     | -18,85 | -41,94 | Vale do Rio Doce         |
| 869 | 6/27/2018 | neg | na | <i>Callithrix</i> | non-epi | urban | good         | Acucena                  | -19,07 | -42,54 | Vale do Rio Doce         |
| 848 | 6/28/2018 | neg | na | <i>Callithrix</i> | non-epi | urban | good         | Guape                    | -20,76 | -45,91 | Sul/Sudoeste de Minas    |
| 867 | 7/4/2018  | neg | na | <i>Callithrix</i> | non-epi | rural | na           | Alpinopolis              | -20,86 | -46,38 | Sul/Sudoeste de Minas    |
| 840 | 7/5/2018  | neg | na | <i>Callithrix</i> | non-epi | rural | na           | Sacramento               | -19,86 | -47,44 | Triangulo/Alto Paranaiba |
| 865 | 7/9/2018  | neg | na | <i>Callithrix</i> | non-epi | rural | na           | Itabira                  | -19,61 | -43,22 | Metropolitana            |
| 855 | 7/16/2018 | neg | na | <i>Callithrix</i> | non-epi | urban | intermediate | Paracatu                 | -17,22 | -46,87 | Noroeste de Minas        |

|     |           |     |    |                   |         |             |              |                          |        |        |                          |
|-----|-----------|-----|----|-------------------|---------|-------------|--------------|--------------------------|--------|--------|--------------------------|
| 841 | 7/18/2018 | neg | na | <i>Callithrix</i> | non-epi | rural       | good         | Passos                   | -20,71 | -46,61 | Sul/Sudoeste de Minas    |
| 837 | 7/18/2018 | neg | na | <i>Callithrix</i> | non-epi | urban       | good         | Arapora                  | -18,43 | -49,18 | Triangulo/Alto Paranaiba |
| 857 | 7/19/2018 | neg | na | <i>Callithrix</i> | non-epi | urban       | good         | Belo Horizonte           | -19,81 | -43,95 | Metropolitana            |
| 856 | 7/19/2018 | neg | na | <i>Callithrix</i> | non-epi | rural       | intermediate | Leopoldina               | -21,53 | -42,64 | Zona da Mata             |
| 860 | 7/20/2018 | neg | na | <i>Callithrix</i> | non-epi | urban       | good         | Belo Horizonte           | -19,81 | -43,95 | Metropolitana            |
| 844 | 7/24/2018 | neg | na | <i>Callithrix</i> | non-epi | urban       | good         | Governador Valadares     | -18,85 | -41,94 | Vale do Rio Doce         |
| 864 | 7/24/2018 | neg | na | <i>Callithrix</i> | non-epi | urban       | good         | Governador Valadares     | -18,85 | -41,94 | Vale do Rio Doce         |
| 861 | 7/24/2018 | neg | na | <i>Callithrix</i> | non-epi | urban       | intermediate | Sao Jose da Lapa         | -19,7  | -43,95 | Metropolitana            |
| 836 | 7/24/2018 | neg | na | <i>Alouatta</i>   | non-epi | urban       | na           | Belo Horizonte           | -19,81 | -43,95 | Metropolitana            |
| 862 | 7/25/2018 | neg | na | <i>Callithrix</i> | non-epi | rural       | bad          | Cana Verde               | -21,02 | -45,18 | Oeste de Minas           |
| 868 | 7/25/2018 | neg | na | <i>Callithrix</i> | non-epi | urban       | good         | Barra Longa              | -20,28 | -43,04 | Zona da Mata             |
| 849 | 7/26/2018 | neg | na | <i>Callithrix</i> | non-epi | urban-rural | good         | Rio Paranaiba            | -19,19 | -46,24 | Triangulo/Alto Paranaiba |
| 843 | 7/26/2018 | neg | na | <i>Callithrix</i> | non-epi | urban       | intermediate | Patos de Minas           | -18,57 | -46,51 | Triangulo/Alto Paranaiba |
| 851 | 8/2/2018  | neg | na | <i>Callithrix</i> | non-epi | rural       | good         | Bom Despacho             | -19,73 | -45,25 | Central Mineira          |
| 859 | 8/2/2018  | neg | na | <i>Callithrix</i> | non-epi | rural       | good         | Sao Joao Nepomuceno      | -21,54 | -43,01 | Zona da Mata             |
| 852 | 8/3/2018  | neg | na | na                | non-epi | rural       | good         | Sao Domingos do Prata    | -19,86 | -42,96 | Metropolitana            |
| 854 | 8/3/2018  | neg | na | <i>Callithrix</i> | non-epi | urban       | good         | Conceicao da Aparecida   | -21,09 | -46,2  | Sul/Sudoeste de Minas    |
| 839 | 8/3/2018  | neg | na | <i>Callithrix</i> | non-epi | rural       | intermediate | Pedro Leopoldo           | -19,61 | -44,04 | Metropolitana            |
| 863 | 8/6/2018  | neg | na | <i>Callithrix</i> | non-epi | urban       | good         | Lontra                   | -15,9  | -44,3  | Norte de Minas           |
| 858 | 8/7/2018  | neg | na | <i>Callithrix</i> | non-epi | rural       | good         | Cabeceira Grande         | -16,03 | -47,09 | Noroeste de Minas        |
| 842 | 8/7/2018  | neg | na | <i>Callithrix</i> | non-epi | urban       | good         | Sao Sebastiao do Paraiso | -20,91 | -46,99 | Sul/Sudoeste de Minas    |
| 853 | 8/10/2018 | neg | na | <i>Callithrix</i> | non-epi | urban       | good         | Belo Horizonte           | -19,81 | -43,95 | Metropolitana            |
| 866 | 8/16/2018 | neg | na | <i>Callithrix</i> | non-epi | rural       | good         | Inhauma                  | -19,49 | -44,39 | Metropolitana            |
| 882 | 8/21/2018 | neg | na | <i>Callithrix</i> | non-epi | urban       | good         | Araxa                    | -19,59 | -46,94 | Triangulo/Alto Paranaiba |

|     |            |     |    |                   |         |             |              |                           |        |        |                          |
|-----|------------|-----|----|-------------------|---------|-------------|--------------|---------------------------|--------|--------|--------------------------|
| 884 | 8/23/2018  | neg | na | <i>Callithrix</i> | non-epi | urban       | good         | Belo Horizonte            | -19,81 | -43,95 | Metropolitana            |
| 876 | 8/24/2018  | neg | na | <i>Callithrix</i> | non-epi | urban       | intermediate | Congonhas                 | -20,5  | -43,85 | Metropolitana            |
| 870 | 8/28/2018  | neg | na | <i>Callithrix</i> | non-epi | urban       | good         | Belo Horizonte            | -19,81 | -43,95 | Metropolitana            |
| 881 | 8/29/2018  | neg | na | <i>Callithrix</i> | non-epi | urban       | good         | Estrela do Sul            | -18,74 | -47,69 | Triangulo/Alto Paranaíba |
| 890 | 8/30/2018  | neg | na | <i>Callithrix</i> | non-epi | urban       | intermediate | Raposos                   | -19,96 | -43,8  | Metropolitana            |
| 892 | 8/31/2018  | neg | na | <i>Callithrix</i> | non-epi | urban       | good         | Campo Belo                | -20,89 | -45,27 | Oeste de Minas           |
| 873 | 8/31/2018  | neg | na | <i>Callithrix</i> | non-epi | urban       | intermediate | Leopoldina                | -21,53 | -42,64 | Zona da Mata             |
| 874 | 8/31/2018  | neg | na | <i>Callithrix</i> | non-epi | urban       | intermediate | Leopoldina                | -21,53 | -42,64 | Zona da Mata             |
| 883 | 8/31/2018  | neg | na | <i>Callithrix</i> | non-epi | urban-rural | intermediate | Visconde do Rio Branco    | -21,01 | -42,84 | Zona da Mata             |
| 875 | 9/11/2018  | neg | na | <i>Callithrix</i> | non-epi | urban       | na           | Belo Horizonte            | -19,81 | -43,95 | Metropolitana            |
| 880 | 9/12/2018  | neg | na | <i>Callithrix</i> | non-epi | urban       | good         | Guape                     | -20,76 | -45,91 | Sul/Sudoeste de Minas    |
| 891 | 9/14/2018  | neg | na | <i>Callithrix</i> | non-epi | rural       | good         | Sao Joao Del Rei          | -21,13 | -44,26 | Campo das Vertentes      |
| 893 | 9/17/2018  | neg | na | na                | non-epi | rural       | intermediate | Pimenta                   | -20,48 | -45,79 | Oeste de Minas           |
| 872 | 9/21/2018  | neg | na | <i>Callithrix</i> | non-epi | urban       | good         | Belo Horizonte            | -19,81 | -43,95 | Metropolitana            |
| 887 | 9/21/2018  | neg | na | <i>Callithrix</i> | non-epi | urban       | good         | Belo Horizonte            | -19,81 | -43,95 | Metropolitana            |
| 871 | 9/24/2018  | neg | na | <i>Callithrix</i> | non-epi | urban       | good         | Itabira                   | -19,61 | -43,22 | Metropolitana            |
| 888 | 9/27/2018  | neg | na | <i>Callithrix</i> | non-epi | urban       | intermediate | Sao Goncalo do Rio Abaixo | -19,82 | -43,36 | Metropolitana            |
| 885 | 10/1/2018  | neg | na | <i>Callithrix</i> | non-epi | urban       | good         | Belo Horizonte            | -19,81 | -43,95 | Metropolitana            |
| 889 | 10/1/2018  | neg | na | <i>Callithrix</i> | non-epi | urban       | good         | Itabira                   | -19,61 | -43,22 | Metropolitana            |
| 886 | 10/1/2018  | neg | na | <i>Callithrix</i> | non-epi | urban       | good         | Iturama                   | -19,72 | -50,19 | Triangulo/Alto Paranaíba |
| 879 | 10/1/2018  | neg | na | <i>Callithrix</i> | non-epi | rural       | intermediate | Itapagipe                 | -19,9  | -49,38 | Triangulo/Alto Paranaíba |
| 877 | 10/3/2018  | neg | na | <i>Callithrix</i> | non-epi | rural       | good         | Araguari                  | -18,64 | -48,18 | Triangulo/Alto Paranaíba |
| 878 | 10/3/2018  | neg | na | <i>Callithrix</i> | non-epi | urban       | intermediate | Patrocínio                | -18,94 | -46,99 | Triangulo/Alto Paranaíba |
| 896 | 10/23/2018 | neg | na | <i>Callithrix</i> | non-epi | urban       | good         | Bom Jardim de Minas       | -21,94 | -44,19 | Sul/Sudoeste de Minas    |



|     |            |     |    |                   |         |       |              |                |        |        |               |
|-----|------------|-----|----|-------------------|---------|-------|--------------|----------------|--------|--------|---------------|
| 897 | 11/20/2018 | neg | na | <i>Callithrix</i> | non-epi | urban | intermediate | Belo Horizonte | -19,81 | -43,95 | Metropolitana |
| 895 | 11/29/2018 | neg | na | <i>Callithrix</i> | non-epi | urban | good         | Sete Lagoas    | -19,46 | -44,24 | Metropolitana |

---

ID: identification of non-human primate carcasses. Epi week: epidemiological week. Area: sampling area. Urban-rural: urban-rural interface. Lat: latitude. Long: longitude. RTqPCR-YFV: one-step real time polymerase chain reaction for investigation of yellow fever virus RNA, performed using methods described by Domingo and colleagues, 2012 (DOI: 10.1128/JCM.01799-12). neg: negative result, pos: positive. \* total RNA obtained from lung sample. Na: not available.
